# Supplementary material
Source: publisher site journal article supplement (https://www.spandidos-publications.com/8368/downloadSupplementary)
Supplement: Supplementary file 1 [file downloadSupplementary]

## Sheet: Table SI
Table SI. Molecular weight distribution of fish collagen peptide.
Molecular weight range, Da	Peak area ratio, %	Number-average molecular weight, Da	Weight-average molecular weight, Da
>5,000	1.49	6240	6535
5,000-3,000	5.53	3653	3726
3,000-2,000	8.86	2412	2444
2,000-1,000	22.11	1320	1376
1,000-500	30.69	658	682
500-189	27.28	288	308
<189	4.04	-	-
Peptides with molecular weight <5,000 Da: 98.51%. Total average number-average molecular weight (Mn): 1,085.49 Da

## Sheet: Table SII
Table SII. Amino acid composition of fully hydrolysed fish collagen peptide.
Amino acid name	Content, g/100 g
Alanine	9.36
Arginine	7.29
Aspartic acid	5.56
Glutamic acid	9.48
Glycine	21.1
Histidine	1.14
Isoleucine	1.57
Leucine	2.64
Lysine	3.25
Methionine	1.9
Phenylalanine	1.92
Proline	10.5
Serine	3.3
Threonine	2.64
Tyrosine	0.8
Valine	2.32
Total	84.8

## Sheet: Table SIII
Table SIII. Significantly altered metabolites between SP and NC groUps.
Compound_ID	Name	FC	log2FC	Pvalue	ROC	VIP	Up/Downregulation	ClassI	ClassII	ClassIII	all_SP1	all_SP2	all_SP3	all_SP4	all_NC1	all_NC2	all_NC3	all_NC4
Com_2356_pos	MG(0:0/i-13:0/0:0)	4.36845	2.12712	0.000169298	1	2.8549	Up	Lipids and lipid-like molecules	Glycerolipids	Monoradylglycerols	2.09678e+08	2.08067e+08	2.60126e+08	2.12759e+08	3.75317e+07	5.85655e+07	4.72057e+07	6.0575e+07
Com_2603_pos	MG(0:0/i-15:0/0:0)	2.87169	1.5219	0.00943154	1	2.69923	Up	Lipids and lipid-like molecules	Glycerolipids	Monoradylglycerols	2.85459e+08	2.8882e+08	3.66351e+08	2.74767e+08	5.53523e+07	1.37218e+08	1.00753e+08	1.29909e+08
Com_2957_pos	Terazosin	2.13175	1.09204	0.0228359	1	1.50027	Up	Organoheterocyclic compounds	Diazinanes	Piperazines	1.19235e+07	1.37093e+07	1.38775e+07	9.00037e+06	4.27689e+06	3.3007e+06	7.74642e+06	7.43222e+06
Com_947_neg	1-Hydroxy-6-methoxypyrene	2.12743	1.08911	0.00806881	1	1.79397	Up	Benzenoids	Pyrenes	-	2.0145e+07	2.4611e+07	2.67077e+07	3.42454e+07	1.11696e+07	1.39218e+07	8.08976e+06	1.65076e+07
Com_1920_pos	7alpha-Hydroxysophoramine	2.03727	1.02664	0.0360396	1	1.8865	Up	Organoheterocyclic compounds	Diazanaphthalenes	Naphthyridines	4.89998e+06	5.02487e+06	4.62261e+06	5.90149e+06	1.87055e+06	1.49079e+06	2.44212e+06	4.23394e+06
Com_839_pos	Palmitoylcarnitine	1.99714	0.997938	0.0446635	0.9375	1.67659	Up	Lipids and lipid-like molecules	Fatty Acyls	Fatty acid esters	1.21544e+07	9.8714e+06	6.5572e+06	7.6605e+06	2.75567e+06	2.82484e+06	5.12761e+06	7.43955e+06
Com_1270_neg	Sedoheptulose 7-phosphate	1.99296	0.994913	0.0426352	0.875	1.62118	Up	Organic oxygen compounds	Organooxygen compounds	Carbohydrates and carbohydrate conjugates	6.92574e+07	5.93921e+07	5.0982e+07	1.17532e+08	3.75074e+07	2.64968e+07	2.47862e+07	6.03162e+07
Com_366_neg	N-Acetylneuraminic acid	1.89475	0.922008	0.00265203	1	2.56946	Up	Organic oxygen compounds	Organooxygen compounds	Carbohydrates and carbohydrate conjugates	4.97618e+08	4.79626e+08	3.97138e+08	4.84386e+08	1.89032e+08	2.46976e+08	3.03475e+08	2.41526e+08
Com_927_pos	Citicoline	1.89046	0.918741	0.00490842	1	1.68646	Up	Nucleosides, nucleotides, and analogues	Pyrimidine nucleotides	Pyrimidine ribonucleotides	4.71055e+07	5.48936e+07	5.37536e+07	6.78021e+07	2.45721e+07	2.55927e+07	2.74186e+07	4.06705e+07
Com_1250_neg	Orotidine	1.6416	0.7151	0.00908267	1	1.44848	Up	Nucleosides, nucleotides, and analogues	Pyrimidine nucleosides	-	4.32288e+06	5.5605e+06	3.74719e+06	5.18162e+06	2.26687e+06	2.57473e+06	3.16195e+06	3.45614e+06
Com_1651_neg	Desacetyltetraneurin D 15-O-isobutyrate	0.656453	-0.607236	0.0235376	1	1.38926	Down	Lipids and lipid-like molecules	Prenol lipids	Terpene lactones	7.11975e+06	4.64975e+06	6.20259e+06	5.79852e+06	8.08868e+06	8.57788e+06	1.20259e+07	7.51821e+06
Com_2307_pos	dapdiamide A	0.656264	-0.607652	0.0455025	0.9375	1.14477	Down	Lipids and lipid-like molecules	Glycerophospholipids	Glycerophosphoserines	1.20327e+08	1.29275e+08	1.55631e+08	1.20992e+08	2.2802e+08	2.32423e+08	2.08087e+08	1.33318e+08
Com_2946_pos	Pro Arg Leu	0.576578	-0.794413	0.00348023	1	2.65101	Down	Organic acids and derivatives	Carboxylic acids and derivatives	Amino acids, peptides, and analogues	4.15811e+08	3.75838e+08	4.61984e+08	3.736e+08	6.88687e+08	8.9257e+08	5.94149e+08	6.46822e+08
Com_3202_pos	Tyr Gln Phe	0.571538	-0.807079	0.0186108	0.9375	1.66699	Down	Organic acids and derivatives	Carboxylic acids and derivatives	Amino acids, peptides, and analogues	3.3702e+06	4.79163e+06	3.14934e+06	5.6634e+06	8.42295e+06	8.79272e+06	6.82947e+06	5.6547e+06
Com_1327_neg	D-4'-Phosphopantothenate	0.533926	-0.905287	0.00954656	1	1.97891	Down	Organic acids and derivatives	Carboxylic acids and derivatives	Amino acids, peptides, and analogues	8.05302e+07	8.04398e+07	1.0794e+08	6.25731e+07	1.87506e+08	1.81869e+08	1.4051e+08	1.10956e+08
Com_2080_pos	N-(1-Deoxy-1-fructosyl)proline	0.529887	-0.916244	0.0160965	1	1.69523	Down	Organic acids and derivatives	Carboxylic acids and derivatives	Amino acids, peptides, and analogues	2.8672e+06	4.98964e+06	5.14553e+06	5.46218e+06	7.74542e+06	1.1966e+07	7.01579e+06	8.11904e+06
Com_1419_pos	11-Aminoundecanoic acid	0.499074	-1.00267	1.18065e-06	1	2.25912	Down	Lipids and lipid-like molecules	Fatty Acyls	Fatty acids and conjugates	9.85518e+07	1.04725e+08	1.05306e+08	9.59419e+07	1.98782e+08	2.17812e+08	2.01209e+08	1.92748e+08
Com_2582_pos	Centhaquine	0.490419	-1.02791	0.048623	0.9375	2.00687	Down	Organoheterocyclic compounds	Diazinanes	Piperazines	7.96413e+06	1.52266e+07	2.72154e+07	1.06809e+07	3.88198e+07	2.87596e+07	2.44549e+07	3.25265e+07
Com_1257_pos	Aspinonediol	0.385341	-1.37579	0.00351796	1	2.24255	Down	Lipids and lipid-like molecules	Fatty Acyls	Fatty alcohols	9.24356e+06	5.47667e+06	6.40975e+06	5.8143e+06	1.68206e+07	1.09231e+07	2.16712e+07	2.05083e+07
Com_794_neg	thymol sulfate	0.365264	-1.45299	2.04708e-05	1	2.54555	Down	Organic acids and derivatives	Organic sulfuric acids and derivatives	Arylsulfates	7.51781e+06	8.08312e+06	9.831e+06	7.87928e+06	1.93217e+07	2.34756e+07	2.2659e+07	2.57415e+07
Com_2013_neg	Guanosine triphosphate	0.267023	-1.90496	0.0311762	1	1.43139	Down	Nucleosides, nucleotides, and analogues	Purine nucleotides	Purine ribonucleotides	5.59532e+08	6.22993e+08	7.44172e+08	4.39028e+08	3.62627e+09	3.0153e+09	1.30391e+09	9.14149e+08
Com_1401_pos	N-Methyldodecylamine	0.193935	-2.36635	0.00752123	1	2.8156	Down	Organic nitrogen compounds	Organonitrogen compounds	Amines	2.53747e+07	2.09963e+07	2.52133e+07	2.20696e+07	5.48197e+07	1.53068e+08	1.06871e+08	1.68154e+08
Com_2728_pos	MG(0:0/18:4(6Z,9Z,12Z,15Z)/0:0)	0.0857498	-3.54372	0.0269547	1	1.88035	Down	Lipids and lipid-like molecules	Fatty Acyls	Lineolic acids and derivatives	734024	469871	135440	180577	1.32335e+07	1.89915e+06	1.63726e+06	955094
Com_1472_pos	N,N-Dimethyldodecylamine	0.0134503	-6.21622	0.00358613	1	2.79141	Down	Organic nitrogen compounds	Organonitrogen compounds	Amines	4.18198e+07	3.69955e+07	3.88842e+07	3.68074e+07	5.31548e+08	4.16247e+09	2.63761e+09	4.15565e+09
SP, Streptococcus pneumoniae; NC, negative control; FC, fold-change.

## Sheet: Table SIV
Table SIV. Significantly altered metabolites between GLU_SP and SP groUps.
Compound_ID	Name	FC	log2FC	Pvalue	ROC	VIP	Up/Downregulation	ClassI	ClassII	ClassIII	all_GL_SP1	all_GL_SP2	all_GL_SP3	all_GL_SP4	all_SP1	all_SP2	all_SP3	all_SP4
Com_515_neg	Isoamyl isothiocyanate	18.5149	4.21062	0.000400842	1	2.46225	Up	Organosulfur compounds	Isothiocyanates	-	1.94945e+07	1.75303e+07	1.94878e+07	2.05197e+07	864089	621072	1.30919e+06	1.3662e+06
Com_2201_pos	Lauroyl diethanolamide	10.738	3.42465	3.51362e-05	1	2.2793	Up	Lipids and lipid-like molecules	Fatty Acyls	Fatty amides	2.74681e+08	3.32146e+08	2.36921e+08	4.39146e+08	2.38201e+07	2.56392e+07	4.63564e+07	2.36567e+07
Com_562_neg	4,5-dihydroxyhexanoic acid	10.3663	3.37382	0.000598116	1	2.68791	Up	Organic acids and derivatives	Hydroxy acids and derivatives	Medium-chain hydroxy acids and derivatives	7.19406e+07	6.60131e+07	7.34355e+07	6.87571e+07	7.56148e+06	7.4879e+06	7.99109e+06	3.98433e+06
Com_1251_pos	IS_2-FLUROPHENYLGLYCINE	7.93419	2.98808	1.79682e-05	1	2.68374	Up	Organic acids and derivatives	Carboxylic acids and derivatives	Amino acids, peptides, and analogues	3.54734e+08	3.34622e+08	3.73125e+08	3.5863e+08	4.26972e+07	4.1627e+07	5.42888e+07	4.04993e+07
Com_1562_neg	Spectinomycin	7.90971	2.98362	0.0114598	1	1.93101	Up	Organoheterocyclic compounds	Dioxanes	1,4-dioxanes	1.06001e+06	2.81522e+06	7.99625e+06	2.24102e+06	725223	173581	368540	516857
Com_75_pos	L-Glutamine	5.87151	2.55373	1.06627e-06	1	2.70983	Up	Organic acids and derivatives	Carboxylic acids and derivatives	Amino acids, peptides, and analogues	7.83224e+09	7.52883e+09	9.26104e+09	7.74671e+09	1.40906e+09	1.31331e+09	1.4637e+09	1.3268e+09
Com_3335_pos	C16 Sphinganine	2.99229	1.58125	0.0159738	1	1.48213	Up	Lipids and lipid-like molecules	Sphingolipids	Ceramides	3.00445e+07	4.50309e+07	2.10963e+07	1.42764e+07	7.18427e+06	5.49897e+06	1.25059e+07	1.17218e+07
Com_619_neg	Propane-1,2,3-tricarboxylate	2.96224	1.56669	0.0240199	1	1.42343	Up	Organic acids and derivatives	Carboxylic acids and derivatives	Tricarboxylic acids and derivatives	1.10155e+07	2.90893e+07	3.19771e+07	1.4127e+07	5.8254e+06	9.69152e+06	6.19721e+06	7.38844e+06
Com_1380_pos	3,4-Dimethoxypropiophenone	2.90799	1.54002	0.000590454	1	1.57828	Up	Organic oxygen compounds	Organooxygen compounds	Carbonyl compounds	7.16922e+06	8.94777e+06	1.2869e+07	9.7081e+06	3.20442e+06	4.14252e+06	3.27692e+06	2.68226e+06
Com_1252_neg	1-Pyrenebutyric acid	2.78829	1.47938	0.0462131	0.9375	1.71117	Up	Benzenoids	Pyrenes	-	1.16054e+06	3.01125e+06	3.22808e+06	1.70432e+06	562772	898125	1.52175e+06	282512
Com_867_neg	Morin-5'-sulfonic acid	2.67858	1.42147	3.26165e-06	1	2.61197	Up	Benzenoids	Benzene and substituted derivatives	Anilides	7.08723e+07	7.97825e+07	7.12263e+07	6.9128e+07	2.50331e+07	2.55206e+07	2.80291e+07	3.006e+07
Com_3023_pos	Arg Leu Ile	2.50733	1.32615	0.0118521	1	1.51881	Up	Organic acids and derivatives	Carboxylic acids and derivatives	Amino acids, peptides, and analogues	4.77132e+07	3.12239e+07	6.36602e+07	4.00411e+07	1.09036e+07	1.34257e+07	2.20544e+07	2.64581e+07
Com_1809_neg	l-lysyl-l-lysyl-l-lysine	2.45853	1.2978	0.00408601	1	1.2678	Up	Organic acids and derivatives	Carboxylic acids and derivatives	Amino acids, peptides, and analogues	4.53863e+06	5.41699e+06	4.46432e+06	2.94912e+06	1.17304e+06	1.56785e+06	1.93098e+06	2.39295e+06
Com_2025_pos	Hept-5-enoylcarnitine	2.38879	1.25628	0.0081134	1	1.15088	Up	Lipids and lipid-like molecules	Fatty Acyls	Fatty acid esters	1.21468e+07	8.0782e+06	8.2002e+06	6.03795e+06	4.96627e+06	4.03229e+06	2.22762e+06	3.20085e+06
Com_3088_pos	Hexadecyl ferulate	2.2959	1.19906	0.0192775	1	1.6265	Up	Phenylpropanoids and polyketides	Cinnamic acids and derivatives	Hydroxycinnamic acids and derivatives	7.2791e+06	4.46314e+06	6.1813e+06	4.13001e+06	1.60944e+06	2.31583e+06	1.59575e+06	4.08459e+06
Com_3202_pos	Tyr Gln Phe	2.27507	1.18591	0.00860026	1	2.4076	Up	Organic acids and derivatives	Carboxylic acids and derivatives	Amino acids, peptides, and analogues	9.9256e+06	9.3929e+06	9.43499e+06	9.86494e+06	3.3702e+06	4.79163e+06	3.14934e+06	5.6634e+06
Com_3083_pos	Ala-Leu-Leu-Thr	2.06058	1.04305	0.000301314	1	1.24669	Up	Organic acids and derivatives	Carboxylic acids and derivatives	Amino acids, peptides, and analogues	9.81577e+07	7.87524e+07	7.94017e+07	7.62607e+07	3.90778e+07	4.18995e+07	3.82191e+07	4.22012e+07
Com_3194_pos	N-Acetyl-leu-leu-tyr-amide	1.99334	0.995191	0.000618598	1	1.02932	Up	Organic acids and derivatives	Carboxylic acids and derivatives	Amino acids, peptides, and analogues	8.94087e+07	9.35972e+07	8.2299e+07	6.79379e+07	4.02871e+07	4.5713e+07	4.24082e+07	3.87694e+07
Com_1330_pos	Dimethyl pimelimidate	1.98445	0.98874	0.0110357	0.9375	1.33388	Up	Organic acids and derivatives	Carboximidic acids and derivatives	Imidoesters	4.14113e+08	3.85826e+08	3.91417e+08	2.44186e+08	1.73299e+08	1.52498e+08	1.34438e+08	2.6316e+08
Com_3144_pos	Arg Glu Met	1.98196	0.986929	8.09715e-05	1	1.05443	Up	Organic acids and derivatives	Carboxylic acids and derivatives	Amino acids, peptides, and analogues	7.64018e+07	8.0526e+07	7.73742e+07	6.53102e+07	3.85265e+07	3.40446e+07	3.52518e+07	4.33466e+07
Com_27_pos	Cyclo(Ala-Gly)	1.98154	0.986624	6.99456e-06	1	1.95988	Up	Organic acids and derivatives	Carboxylic acids and derivatives	Amino acids, peptides, and analogues	6.97002e+08	6.6821e+08	7.82119e+08	7.41057e+08	3.86669e+08	3.6323e+08	3.38726e+08	3.69022e+08
Com_241_pos	Spermine	1.97419	0.981262	0.0190304	1	1.15341	Up	Organic nitrogen compounds	Organonitrogen compounds	Amines	1.94411e+09	2.31965e+09	2.24607e+09	1.72332e+09	7.98034e+08	6.94013e+08	1.42328e+09	1.25506e+09
Com_139_pos	4-Hydroxyisoleucine	1.9511	0.964285	0.0106326	0.9375	1.18387	Up	Organic acids and derivatives	Carboxylic acids and derivatives	Amino acids, peptides, and analogues	2.39586e+07	2.81311e+07	1.98758e+07	1.53249e+07	9.24406e+06	9.86895e+06	1.59893e+07	9.63686e+06
Com_1275_neg	16alpha-Fluoroestradiol	1.94696	0.961225	0.00282246	1	1.13805	Up	Lipids and lipid-like molecules	Steroids and steroid derivatives	Estrane steroids	2.31057e+07	2.68871e+07	2.09429e+07	2.11425e+07	8.78434e+06	1.17287e+07	1.44282e+07	1.2352e+07
Com_1551_neg	(+/-)-Currayangine	1.94041	0.956362	0.0369042	1	1.02799	Up	Organoheterocyclic compounds	Quinolines and derivatives	Benzoquinolines	5.04162e+07	4.93334e+07	4.50168e+07	4.58786e+07	2.85099e+07	2.69076e+07	1.2775e+07	3.00574e+07
Com_2055_neg	Plukenetione C	1.91647	0.93845	0.0271571	0.9375	1.71799	Up	Organic oxygen compounds	Organooxygen compounds	Carbonyl compounds	2.71753e+07	1.86609e+07	1.2807e+07	2.04452e+07	1.56982e+07	9.89273e+06	8.18778e+06	7.48915e+06
Com_1999_pos	H-Ser-Tyr-OH	1.89792	0.924416	0.0246175	1	1.72517	Up	Organic acids and derivatives	Carboxylic acids and derivatives	Amino acids, peptides, and analogues	3.41822e+09	3.71247e+09	3.31906e+09	3.30312e+09	1.25134e+09	2.14697e+09	2.47091e+09	1.37708e+09
Com_785_pos	GMP	1.89687	0.92362	0.0420914	1	1.79739	Up	Nucleosides, nucleotides, and analogues	Purine nucleotides	Purine ribonucleotides	8.02468e+09	7.55963e+09	7.7919e+09	7.62406e+09	3.21302e+09	3.00012e+09	3.0212e+09	7.10852e+09
Com_1973_neg	Ustiloxin D	1.88412	0.913889	0.025894	0.9375	1.37028	Up	Organic acids and derivatives	Carboxylic acids and derivatives	Amino acids, peptides, and analogues	1.68944e+07	1.79773e+07	1.63774e+07	8.84945e+06	7.5598e+06	7.85326e+06	5.9209e+06	1.05635e+07
Com_2235_pos	8-[3-oxo-2-[(E)-pent-2-enyl]cyclopenten-1-yl]octanoic acid	1.88008	0.910795	0.0489313	0.9375	1.63589	Up	Lipids and lipid-like molecules	Fatty Acyls	Fatty acids and conjugates	6.66788e+06	7.99108e+06	1.15983e+07	1.57586e+07	7.83023e+06	3.7711e+06	5.14834e+06	5.59828e+06
Com_461_neg	Periplogenin	1.87898	0.909948	0.000705357	1	1.1632	Up	Lipids and lipid-like molecules	Steroids and steroid derivatives	Steroid lactones	1.32527e+07	1.44929e+07	1.31294e+07	1.10729e+07	6.95136e+06	6.70061e+06	5.72967e+06	8.26527e+06
Com_1948_neg	Loperamide	1.87672	0.908211	0.00760008	1	1.46901	Up	Benzenoids	Benzene and substituted derivatives	Diphenylmethanes	6.51605e+07	6.45207e+07	6.35764e+07	5.71389e+07	3.67617e+07	2.40378e+07	3.27756e+07	3.98475e+07
Com_1428_pos	9-methanesulfinylnonanoic acid	1.84677	0.885007	0.0374278	1	1.01597	Up	Lipids and lipid-like molecules	Fatty Acyls	Fatty acids and conjugates	1.77883e+07	1.57242e+07	1.17376e+07	1.70573e+07	1.09632e+07	8.0229e+06	4.56482e+06	1.01876e+07
Com_3028_pos	Ala-Leu-Leu-Ser	1.84278	0.88188	0.000548037	1	1.51739	Up	Organic acids and derivatives	Carboxylic acids and derivatives	Amino acids, peptides, and analogues	3.74349e+08	3.31363e+08	3.58135e+08	2.83164e+08	1.90045e+08	1.74806e+08	1.54076e+08	2.12041e+08
Com_1696_neg	XANTHOSINE 5'-MONOPHOSPHATE	1.83836	0.878418	0.0329212	1	1.11105	Up	Nucleosides, nucleotides, and analogues	Purine nucleotides	Purine ribonucleotides	1.15926e+09	9.51725e+08	9.92215e+08	9.27253e+08	5.78232e+08	4.81111e+08	3.33169e+08	7.99911e+08
Com_1651_neg	Desacetyltetraneurin D 15-O-isobutyrate	1.81839	0.862664	0.00213204	1	1.78018	Up	Lipids and lipid-like molecules	Prenol lipids	Terpene lactones	9.99921e+06	1.04088e+07	1.3183e+07	9.63326e+06	7.11975e+06	4.64975e+06	6.20259e+06	5.79852e+06
Com_1924_neg	Adenylosuccinic acid	1.81254	0.858012	0.0230311	1	1.93441	Up	Nucleosides, nucleotides, and analogues	Purine nucleotides	Purine ribonucleotides	1.92076e+09	3.94138e+09	3.0223e+09	2.55756e+09	1.17945e+09	1.66009e+09	1.74576e+09	1.72738e+09
Com_2208_pos	Sakacin A	1.80831	0.854644	0.0266425	1	1.15949	Up	Organic acids and derivatives	Carboxylic acids and derivatives	Amino acids, peptides, and analogues	1.06725e+08	1.08284e+08	1.00979e+08	1.03132e+08	7.20352e+07	5.99966e+07	3.57514e+07	6.39907e+07
Com_732_neg	Alanyllysine	1.79622	0.844965	0.00349266	1	2.08016	Up	Organic acids and derivatives	Carboxylic acids and derivatives	Amino acids, peptides, and analogues	1.22701e+08	1.35605e+08	1.3986e+08	1.87316e+08	7.15902e+07	8.17537e+07	1.02273e+08	7.03347e+07
Com_2097_neg	Cilistol j	1.7919	0.841493	0.000620878	1	1.24341	Up	Lipids and lipid-like molecules	Steroids and steroid derivatives	Steroidal glycosides	6.81698e+06	6.30356e+06	5.95926e+06	6.17726e+06	3.48463e+06	3.73743e+06	2.97476e+06	3.89829e+06
Com_1680_neg	N(6)-methyl-AMP	1.78082	0.832542	0.00627605	1	1.17582	Up	Nucleosides, nucleotides, and analogues	Purine nucleotides	Purine ribonucleotides	4.46197e+08	4.35153e+08	5.15535e+08	6.85534e+08	2.98236e+08	3.19956e+08	2.47895e+08	3.03272e+08
Com_1953_pos	(Z)-3-Hexenyl beta-D-glucopyranoside	1.77528	0.828046	0.0475655	1	1.90746	Up	Lipids and lipid-like molecules	Fatty Acyls	Fatty acyl glycosides	2.99227e+08	3.47719e+08	3.0843e+08	2.97588e+08	1.15089e+08	2.6068e+08	1.23839e+08	2.06175e+08
Com_1430_pos	isoleucyl-thiazolidine	1.76602	0.820503	0.00821712	1	1.15595	Up	Organoheterocyclic compounds	Azolidines	Thiazolidines	3.80493e+07	5.27357e+07	3.19187e+07	3.6101e+07	2.40229e+07	2.37687e+07	1.94266e+07	2.27041e+07
Com_1476_neg	Leu-Val-Ser	1.75916	0.814886	0.000233601	1	1.81759	Up	Organic acids and derivatives	Carboxylic acids and derivatives	Amino acids, peptides, and analogues	8.86215e+07	9.75154e+07	9.06956e+07	7.61753e+07	5.3833e+07	5.30321e+07	5.05978e+07	4.32055e+07
Com_1416_neg	2-(4-Morpholinyl)-8-phenyl-4H-1-benzopyran-4-one	1.74516	0.803363	0.00142123	1	1.51835	Up	Organoheterocyclic compounds	Benzopyrans	1-benzopyrans	1.54668e+07	1.45915e+07	1.4236e+07	1.42038e+07	7.98064e+06	8.45708e+06	9.76858e+06	7.31385e+06
Com_3250_pos	Dihydrowithanolide E	1.74291	0.801497	0.000930831	1	1.12664	Up	Lipids and lipid-like molecules	Steroids and steroid derivatives	Steroid lactones	3.29991e+07	3.18575e+07	3.71182e+07	2.71581e+07	1.98366e+07	1.8107e+07	1.69373e+07	1.92095e+07
Com_3089_pos	Caldiamide	1.74191	0.800668	0.0014156	1	1.35725	Up	Organic acids and derivatives	Carboxylic acids and derivatives	Amino acids, peptides, and analogues	1.7118e+08	1.67474e+08	1.52089e+08	1.52003e+08	8.02283e+07	9.53835e+07	1.08989e+08	8.43882e+07
Com_1884_neg	Ceranapril	1.73443	0.794462	0.0278969	0.9375	1.00733	Up	Organic acids and derivatives	Carboxylic acids and derivatives	Amino acids, peptides, and analogues	2.16517e+06	1.16446e+06	1.46692e+06	1.89801e+06	1.23739e+06	846093	1.08721e+06	689111
Com_3129_pos	Ala-Leu-Leu-Asp	1.72855	0.789562	0.0296842	1	2.08023	Up	Organic acids and derivatives	Carboxylic acids and derivatives	Amino acids, peptides, and analogues	1.82644e+08	1.90646e+08	1.80505e+08	1.66998e+08	8.51159e+07	1.31012e+08	1.29409e+08	7.14558e+07
Com_1626_pos	Norfentanyl	1.72635	0.787725	0.0107066	1	1.37467	Up	Benzenoids	Benzene and substituted derivatives	Anilides	1.38757e+07	1.16499e+07	1.01354e+07	8.29907e+06	7.12792e+06	7.22161e+06	6.43223e+06	4.68244e+06
Com_2840_pos	Pro-Val-Gly-Pro	1.71384	0.777236	0.0185404	1	1.20235	Up	Organic acids and derivatives	Carboxylic acids and derivatives	Amino acids, peptides, and analogues	1.24628e+08	1.14553e+08	1.45626e+08	1.00953e+08	8.37804e+07	7.55555e+07	4.59409e+07	7.81563e+07
Com_916_pos	Soyasapogenol A	1.7092	0.773325	0.0213799	1	1.95237	Up	Lipids and lipid-like molecules	Prenol lipids	Triterpenoids	3.05251e+07	4.15765e+07	2.55641e+07	4.53953e+07	1.90068e+07	2.29357e+07	2.48853e+07	1.68726e+07
Com_1808_neg	Merodesmosine	1.70288	0.767977	0.000528144	1	1.45169	Up	Organic acids and derivatives	Carboxylic acids and derivatives	Amino acids, peptides, and analogues	2.40235e+08	2.37133e+08	2.3939e+08	2.0769e+08	1.34747e+08	1.57612e+08	1.195e+08	1.31013e+08
Com_2746_pos	Phenolsulfonphthalein	1.69375	0.760224	0.00233986	1	2.2318	Up	Organoheterocyclic compounds	Benzofurans	Benzofuranones	6.52272e+08	4.77434e+08	6.34222e+08	6.48537e+08	3.52662e+08	3.65347e+08	3.86793e+08	3.19527e+08
Com_3411_pos	Ulongamide E	1.68926	0.756392	0.0103342	1	1.08459	Up	Organic acids and derivatives	Peptidomimetics	Depsipeptides	1.82539e+07	1.87439e+07	2.35972e+07	1.3825e+07	1.3394e+07	9.58213e+06	1.06752e+07	1.04034e+07
Com_923_neg	Arginylalanine	1.6869	0.754379	0.00828247	1	1.9882	Up	Organic acids and derivatives	Carboxylic acids and derivatives	Amino acids, peptides, and analogues	1.92048e+07	1.68263e+07	2.04219e+07	1.94394e+07	1.01777e+07	1.17898e+07	1.41909e+07	8.83078e+06
Com_936_pos	Proscillaridin A	1.67984	0.748327	0.012812	1	1.38349	Up	Lipids and lipid-like molecules	Steroids and steroid derivatives	Steroid lactones	7.68914e+07	7.63494e+07	6.6762e+07	7.74152e+07	4.13206e+07	3.41407e+07	5.8376e+07	4.32137e+07
Com_2387_pos	Isopropalin	1.67489	0.744064	0.020408	1	1.2036	Up	Benzenoids	Benzene and substituted derivatives	Aniline and substituted anilines	6.10595e+08	6.56194e+08	6.5681e+08	5.74566e+08	3.18166e+08	3.87229e+08	5.03923e+08	2.82224e+08
Com_2036_neg	Multifidoside C	1.6734	0.742779	0.0317997	0.9375	1.42101	Up	Lipids and lipid-like molecules	Prenol lipids	Terpene glycosides	4.72172e+07	3.80934e+07	3.84692e+07	2.84063e+07	2.56223e+07	1.93516e+07	1.53742e+07	3.05965e+07
Com_1933_neg	Ustiloxin F	1.65799	0.729439	0.0332394	1	1.65069	Up	Organic acids and derivatives	Carboxylic acids and derivatives	Amino acids, peptides, and analogues	8.95439e+07	8.56648e+07	8.52215e+07	8.0079e+07	5.84375e+07	4.80274e+07	3.36261e+07	6.52832e+07
Com_811_pos	Prostaglandin F2a	1.65578	0.727514	0.00486504	1	2.05466	Up	Lipids and lipid-like molecules	Fatty Acyls	Eicosanoids	8.24889e+07	8.29021e+07	8.11577e+07	8.13922e+07	5.45777e+07	5.44084e+07	4.83009e+07	4.07708e+07
Com_1224_neg	Xanthosine	1.63831	0.71221	0.0135929	1	1.6835	Up	Nucleosides, nucleotides, and analogues	Purine nucleosides	-	7.13427e+08	6.73754e+08	5.96406e+08	6.29326e+08	4.30071e+08	3.43118e+08	3.13536e+08	5.08158e+08
Com_1495_neg	Leu-Thr-Ser	1.63559	0.709808	0.010606	1	1.82308	Up	Organic acids and derivatives	Carboxylic acids and derivatives	Amino acids, peptides, and analogues	4.18424e+07	4.38049e+07	4.32959e+07	3.73208e+07	2.56653e+07	2.65617e+07	3.05082e+07	1.89188e+07
Com_2059_pos	Threonylarginine	1.63166	0.70634	0.0317319	1	1.96772	Up	Organic acids and derivatives	Carboxylic acids and derivatives	Amino acids, peptides, and analogues	2.1326e+08	2.08285e+08	2.21365e+08	2.02196e+08	1.12539e+08	1.2758e+08	1.82612e+08	9.52103e+07
Com_740_pos	Kyotorphin	1.62452	0.700016	0.0464506	1	1.52109	Up	Organic acids and derivatives	Carboxylic acids and derivatives	Amino acids, peptides, and analogues	4.29325e+08	4.44452e+08	4.12167e+08	4.08952e+08	2.20386e+08	2.65208e+08	3.80275e+08	1.7745e+08
Com_2503_pos	Gly Phe Val	1.62349	0.699098	0.00104859	1	1.66617	Up	Organic acids and derivatives	Carboxylic acids and derivatives	Amino acids, peptides, and analogues	3.86025e+07	3.54544e+07	3.48794e+07	3.80401e+07	2.19693e+07	1.95739e+07	2.53239e+07	2.3664e+07
Com_841_pos	Pleuromutilin	1.60699	0.684364	0.00642823	1	1.40951	Up	Lipids and lipid-like molecules	Prenol lipids	Diterpenoids	3.8245e+07	3.82604e+07	4.14933e+07	5.46728e+07	2.79395e+07	3.1526e+07	2.17122e+07	2.62724e+07
Com_1384_neg	Leu-Thr-Ala	1.6051	0.682661	0.0421535	0.9375	1.7253	Up	Organic acids and derivatives	Carboxylic acids and derivatives	Amino acids, peptides, and analogues	1.24002e+08	1.86962e+08	1.79141e+08	1.04405e+08	8.37821e+07	8.68262e+07	8.82149e+07	1.11565e+08
Com_1529_pos	Alanylmethionine	1.60377	0.681469	0.0196072	1	1.41778	Up	Organic acids and derivatives	Carboxylic acids and derivatives	Amino acids, peptides, and analogues	8.27713e+08	9.58692e+08	8.40913e+08	7.43344e+08	5.05449e+08	5.56858e+08	6.65342e+08	3.7406e+08
Com_1995_pos	Allopurinol riboside	1.60342	0.681149	0.0222886	1	1.90809	Up	Nucleosides, nucleotides, and analogues	Pyrazolo[3,4-d]pyrimidine glycosides	-	1.36585e+07	1.33081e+07	1.70576e+07	1.83244e+07	1.26133e+07	9.14792e+06	6.87666e+06	1.02469e+07
Com_1780_pos	Threonyllysine	1.60065	0.67866	0.0158163	1	1.16815	Up	Organic acids and derivatives	Carboxylic acids and derivatives	Amino acids, peptides, and analogues	2.16586e+08	2.13185e+08	2.04557e+08	2.1858e+08	1.45683e+08	1.45442e+08	9.7247e+07	1.44478e+08
Com_1787_neg	Ile Phe Leu	1.59996	0.678034	0.0029362	1	1.37721	Up	Organic acids and derivatives	Carboxylic acids and derivatives	Amino acids, peptides, and analogues	1.29013e+07	1.07311e+07	1.42429e+07	1.04983e+07	7.52131e+06	8.30622e+06	7.7752e+06	6.63157e+06
Com_2621_pos	Phe Gly Ile	1.5963	0.674728	0.0119712	1	1.94476	Up	Organic acids and derivatives	Carboxylic acids and derivatives	Amino acids, peptides, and analogues	9.56352e+07	9.57029e+07	1.35369e+08	8.49312e+07	6.18418e+07	6.13481e+07	7.88645e+07	5.58165e+07
Com_2867_pos	Ile Gln Leu	1.59415	0.672786	0.000703683	1	1.23432	Up	Organic acids and derivatives	Carboxylic acids and derivatives	Amino acids, peptides, and analogues	3.882e+08	3.78441e+08	3.77807e+08	3.32493e+08	2.5472e+08	2.34381e+08	1.97648e+08	2.39726e+08
Com_1745_neg	BCA 10	1.57728	0.657442	0.000919071	1	1.65303	Up	Lipids and lipid-like molecules	Glycerolipids	Diradylglycerols	3.41919e+07	3.54017e+07	2.80059e+07	3.52612e+07	2.42686e+07	1.99191e+07	1.98433e+07	2.02029e+07
Com_2959_pos	Asp Arg Val	1.56618	0.64725	0.000376448	1	1.70279	Up	Organic acids and derivatives	Carboxylic acids and derivatives	Amino acids, peptides, and analogues	9.40983e+08	1.01023e+09	8.83072e+08	8.95946e+08	5.89384e+08	5.23374e+08	6.21926e+08	6.47057e+08
Com_1851_neg	Lys-Asp-Tyr	1.56394	0.645181	0.0237063	1	1.11233	Up	Organic acids and derivatives	Carboxylic acids and derivatives	Amino acids, peptides, and analogues	3.26775e+07	2.95508e+07	2.79223e+07	3.82689e+07	2.50984e+07	1.93507e+07	1.44617e+07	2.32022e+07
Com_2047_neg	PHYSALIN D	1.55959	0.641165	0.0407761	1	1.13914	Up	Lipids and lipid-like molecules	Steroids and steroid derivatives	Physalins and derivatives	6.7868e+06	7.57218e+06	5.36816e+06	5.86268e+06	4.29484e+06	4.98034e+06	2.60393e+06	4.52894e+06
Com_809_pos	Prostaglandin E2	1.55893	0.64056	0.0225845	1	1.97132	Up	Lipids and lipid-like molecules	Fatty Acyls	Eicosanoids	3.03643e+07	3.02504e+07	2.92837e+07	3.34024e+07	2.58675e+07	2.03097e+07	1.52508e+07	1.7665e+07
Com_1980_neg	Lysyl-aspartyl-glutamyl-leucine	1.55493	0.636851	0.0134374	1	1.03962	Up	Organic acids and derivatives	Carboxylic acids and derivatives	Amino acids, peptides, and analogues	1.04083e+08	9.67336e+07	1.02618e+08	9.59962e+07	6.67179e+07	5.89344e+07	5.17536e+07	7.94747e+07
Com_2872_pos	Glu Leu Ile	1.55422	0.636194	0.00123288	1	1.87721	Up	Organic acids and derivatives	Carboxylic acids and derivatives	Amino acids, peptides, and analogues	1.79007e+08	1.90538e+08	1.76195e+08	1.508e+08	1.00472e+08	1.04353e+08	1.30425e+08	1.12909e+08
Com_3087_pos	L-alanyl-gamma-D-glutamyl-L-lysyl-D-alanine	1.55291	0.634972	4.32758e-05	1	1.36208	Up	Organic acids and derivatives	Carboxylic acids and derivatives	Amino acids, peptides, and analogues	3.20059e+08	3.41297e+08	3.16795e+08	2.93483e+08	2.10105e+08	2.12898e+08	1.89731e+08	2.06139e+08
Com_1045_neg	Asparaginyl-Lysine	1.54419	0.626852	0.000261495	1	2.33239	Up	Organic acids and derivatives	Carboxylic acids and derivatives	Amino acids, peptides, and analogues	7.9481e+06	9.67737e+06	8.47021e+06	8.65706e+06	6.08307e+06	5.04284e+06	5.657e+06	5.72254e+06
Com_795_neg	H-Pro-Asp-OH	1.53927	0.622242	0.0211806	1	1.92621	Up	Organic acids and derivatives	Carboxylic acids and derivatives	Amino acids, peptides, and analogues	1.9284e+08	2.35654e+08	1.53502e+08	1.54111e+08	1.18643e+08	1.08019e+08	1.26962e+08	1.24596e+08
Com_3079_pos	Arg Glu Leu	1.53926	0.62224	0.0107649	1	1.30158	Up	Organic acids and derivatives	Carboxylic acids and derivatives	Amino acids, peptides, and analogues	2.26882e+08	2.17086e+08	2.29985e+08	2.05172e+08	1.53706e+08	1.09477e+08	1.57777e+08	1.50173e+08
Com_1505_neg	Gabexate	1.53591	0.619091	0.00552448	1	1.58259	Up	Benzenoids	Benzene and substituted derivatives	Benzoic acids and derivatives	1.43969e+07	1.42383e+07	1.17059e+07	1.1336e+07	8.58812e+06	8.6197e+06	8.21712e+06	8.22101e+06
Com_1504_neg	2-[4-(3,4-Methylenedioxyphenyl)butyl]-4(1H)-quinolinone	1.53514	0.61837	0.0118469	1	1.99099	Up	Organoheterocyclic compounds	Quinolines and derivatives	Quinolones and derivatives	2.8355e+07	2.90391e+07	3.12829e+07	2.43458e+07	2.08743e+07	1.92674e+07	1.97891e+07	1.36929e+07
Com_944_neg	Lysylthreonine	1.53084	0.614325	0.000186029	1	2.17967	Up	Organic acids and derivatives	Carboxylic acids and derivatives	Amino acids, peptides, and analogues	4.93996e+07	4.7911e+07	5.01529e+07	5.19682e+07	3.15106e+07	3.23719e+07	3.57365e+07	3.06569e+07
Com_242_neg	Phenylalanylvaline	1.52974	0.613283	0.00123138	1	1.3323	Up	Organic acids and derivatives	Carboxylic acids and derivatives	Amino acids, peptides, and analogues	3.31478e+08	3.47343e+08	2.98272e+08	2.90593e+08	2.17134e+08	2.29391e+08	1.76365e+08	2.05806e+08
Com_1553_neg	Leu-Leu-Ser	1.52654	0.610261	0.00195455	1	1.5755	Up	Organic acids and derivatives	Carboxylic acids and derivatives	Amino acids, peptides, and analogues	1.33677e+08	1.26807e+08	1.29923e+08	1.08775e+08	8.21829e+07	8.32791e+07	8.23638e+07	7.9177e+07
Com_1800_neg	Bisucaberin	1.52628	0.610023	0.0345837	1	1.05568	Up	Phenylpropanoids and polyketides	Macrolactams	-	1.01569e+08	9.99068e+07	9.80609e+07	9.22237e+07	7.15406e+07	6.10615e+07	4.50178e+07	7.9056e+07
Com_1389_neg	Virolanol C	1.52205	0.606014	0.0154692	1	1.36735	Up	Phenylpropanoids and polyketides	Linear 1,3-diarylpropanoids	Cinnamylphenols	7.22407e+06	7.57901e+06	7.36454e+06	6.815e+06	5.82558e+06	5.15083e+06	3.9801e+06	4.08534e+06
Com_3304_pos	Arginine-glycine-aspartate-O-methyltyrosine amide	1.51136	0.59585	0.0172695	1	1.13016	Up	Organic acids and derivatives	Peptidomimetics	Hybrid peptides	3.22324e+07	3.8203e+07	2.82523e+07	4.03104e+07	1.78015e+07	2.69072e+07	2.11189e+07	2.6141e+07
Com_1552_neg	Ser Leu Ile	1.50954	0.594106	0.00153543	1	1.5847	Up	Organic acids and derivatives	Carboxylic acids and derivatives	Amino acids, peptides, and analogues	1.04629e+08	1.07525e+08	1.06427e+08	9.61454e+07	7.56877e+07	7.33947e+07	6.53846e+07	6.02707e+07
Com_2321_pos	His Phe	1.50902	0.593616	0.0196543	1	1.42455	Up	Organic acids and derivatives	Carboxylic acids and derivatives	Amino acids, peptides, and analogues	4.01329e+08	4.36718e+08	4.03532e+08	4.00054e+08	2.83114e+08	2.66887e+08	3.30654e+08	2.07222e+08
Com_3288_pos	Maraviroc	1.50616	0.590877	0.000607997	1	1.23487	Up	Alkaloids and derivatives	Tropane alkaloids	-	1.98455e+08	1.95958e+08	1.90262e+08	1.76981e+08	1.11747e+08	1.38029e+08	1.30437e+08	1.2548e+08
Com_2979_pos	Leu Met Lys	1.50224	0.587116	0.000198142	1	1.45408	Up	Organic acids and derivatives	Carboxylic acids and derivatives	Amino acids, peptides, and analogues	8.66811e+07	9.2372e+07	7.74231e+07	8.22142e+07	5.88959e+07	5.2191e+07	5.46232e+07	5.97467e+07
Com_2544_pos	H-Tyr-Phe-OH	1.50169	0.58659	0.0138578	1	1.15368	Up	Organic acids and derivatives	Carboxylic acids and derivatives	Amino acids, peptides, and analogues	1.94303e+08	1.98888e+08	2.01472e+08	1.75088e+08	1.3139e+08	1.41644e+08	1.42259e+08	9.72961e+07
Com_1074_neg	Epinephrine sulfate	0.660421	-0.598542	0.0141782	1	1.8846	Down	Organic acids and derivatives	Organic sulfuric acids and derivatives	Arylsulfates	1.16945e+06	1.58687e+06	1.62218e+06	1.64779e+06	2.4373e+06	1.97642e+06	1.92274e+06	2.78847e+06
Com_101_neg	Dethiobiotin	0.660337	-0.598726	0.0168984	1	1.53012	Down	Lipids and lipid-like molecules	Fatty Acyls	Fatty acids and conjugates	8.4838e+07	8.07713e+07	6.49789e+07	5.50753e+07	1.07852e+08	1.06125e+08	1.29067e+08	8.95583e+07
Com_2095_pos	Prolyl-tyrosine	0.65879	-0.60211	0.00836778	1	1.49037	Down	Organic acids and derivatives	Carboxylic acids and derivatives	Amino acids, peptides, and analogues	1.37346e+08	1.27442e+08	1.06649e+08	9.99844e+07	1.64693e+08	1.91585e+08	2.10896e+08	1.48415e+08
Com_1568_pos	Halaminol C	0.654305	-0.611964	0.00329057	1	1.36331	Down	Organic nitrogen compounds	Organonitrogen compounds	Amines	1.92099e+07	1.47147e+07	1.45732e+07	1.79132e+07	2.50358e+07	2.38443e+07	2.90206e+07	2.35977e+07
Com_458_neg	Methyl carnosate	0.643868	-0.635164	0.0409481	1	1.20229	Down	Lipids and lipid-like molecules	Prenol lipids	Diterpenoids	4.72852e+06	5.87917e+06	3.52365e+06	6.74939e+06	8.0256e+06	8.86612e+06	7.26123e+06	8.27721e+06
Com_604_neg	Phenol sulfate	0.641125	-0.641322	5.85324e-07	1	2.41669	Down	Organic acids and derivatives	Organic sulfuric acids and derivatives	Arylsulfates	1.33465e+09	1.27342e+09	1.28435e+09	1.27537e+09	2.01985e+09	2.08038e+09	2.01978e+09	1.94049e+09
Com_2063_neg	13beta,29-Dihydroxymilbemycin A3	0.640129	-0.643566	0.00649347	1	1.8849	Down	Phenylpropanoids and polyketides	Macrolides and analogues	Milbemycins	5.07379e+06	4.21705e+06	5.51137e+06	4.4938e+06	9.45628e+06	6.39294e+06	7.21714e+06	7.07758e+06
Com_340_neg	12-hydroxystearic acid	0.636803	-0.651081	0.0103995	1	1.35937	Down	Lipids and lipid-like molecules	Fatty Acyls	Fatty acids and conjugates	6.08207e+08	7.4297e+08	4.72748e+08	6.10969e+08	1.0211e+09	9.76531e+08	7.49356e+08	1.07663e+09
Com_2727_pos	MG(0:0/16:1(9Z)/0:0)	0.636325	-0.652165	0.00573477	1	1.05811	Down	Lipids and lipid-like molecules	Glycerolipids	Monoradylglycerols	4.32664e+08	3.91272e+08	4.48054e+08	5.54073e+08	8.53764e+08	7.55133e+08	5.92941e+08	6.67865e+08
Com_2803_pos	2-amino-1,3,4,5-icosanetetrol	0.634691	-0.655873	0.00646632	1	1.09647	Down	Organic nitrogen compounds	Organonitrogen compounds	Amines	2.33412e+09	2.56605e+09	1.92791e+09	2.68584e+09	4.30219e+09	3.66978e+09	4.05716e+09	2.96071e+09
Com_2074_neg	LPC 18:1	0.628359	-0.67034	0.00378935	1	1.09615	Down	Lipids and lipid-like molecules	Glycerophospholipids	Glycerophosphocholines	3.90705e+08	4.14645e+08	4.64222e+08	5.5903e+08	7.40796e+08	8.42743e+08	6.48258e+08	6.78331e+08
Com_1918_neg	Doronine	0.623552	-0.681418	0.0127297	1	1.69137	Down	Organic acids and derivatives	Carboxylic acids and derivatives	Tricarboxylic acids and derivatives	2.38601e+06	1.64605e+06	2.15919e+06	2.24758e+06	2.98016e+06	2.92597e+06	4.50004e+06	3.12731e+06
Com_370_neg	(-)-(E)-Guggulsterone	0.623119	-0.68242	0.00627677	1	2.04857	Down	Lipids and lipid-like molecules	Steroids and steroid derivatives	Androstane steroids	1.7555e+07	1.42921e+07	1.47506e+07	1.84086e+07	2.53175e+07	2.66236e+07	3.17125e+07	2.06704e+07
Com_894_pos	Isoverticine	0.622569	-0.683693	0.0351706	1	1.32877	Down	Lipids and lipid-like molecules	Steroids and steroid derivatives	Steroidal alkaloids	2.17468e+07	2.09986e+07	2.49258e+07	3.86622e+07	4.00964e+07	4.37375e+07	4.42829e+07	4.26808e+07
Com_2325_pos	2,4-Bis(1-phenylethyl)phenol	0.621045	-0.687231	0.013401	1	1.22714	Down	Phenylpropanoids and polyketides	Diarylheptanoids	Linear diarylheptanoids	2.68713e+07	1.65119e+07	1.93638e+07	2.19612e+07	2.82854e+07	2.97081e+07	3.64365e+07	4.19663e+07
Com_160_neg	N-Lactoyl-Phenylalanine	0.620435	-0.688649	0.00478552	1	1.66499	Down	Organic acids and derivatives	Carboxylic acids and derivatives	Amino acids, peptides, and analogues	2.13107e+07	1.9094e+07	1.90922e+07	2.51227e+07	3.46033e+07	3.41936e+07	3.37395e+07	3.38512e+07
Com_2049_pos	Charine	0.619553	-0.6907	0.0332873	1	1.1525	Down	Organic oxygen compounds	Organooxygen compounds	Carbohydrates and carbohydrate conjugates	2.11634e+06	2.16739e+06	1.31362e+06	2.07605e+06	2.74397e+06	3.36905e+06	4.01252e+06	2.25984e+06
Com_394_neg	Thymidine-5'-monophosphate	0.616165	-0.698613	0.0335765	0.9375	1.94448	Down	Nucleosides, nucleotides, and analogues	Pyrimidine nucleotides	Pyrimidine deoxyribonucleotides	1.45251e+08	2.61427e+08	1.34937e+08	1.55895e+08	3.00712e+08	3.21736e+08	2.37606e+08	2.71963e+08
Com_710_neg	Homoisocitrate	0.609199	-0.715014	0.0132763	1	2.11156	Down	Organic acids and derivatives	Carboxylic acids and derivatives	Tricarboxylic acids and derivatives	5.40155e+07	3.36262e+07	4.05108e+07	5.34541e+07	7.74225e+07	8.45612e+07	6.23703e+07	7.37531e+07
Com_65_neg	(Ethoxymethyl)benzene	0.606654	-0.721053	0.020971	1	2.20662	Down	Benzenoids	Benzene and substituted derivatives	Benzylethers	2.53208e+06	1.91129e+06	2.29232e+06	2.09074e+06	4.89525e+06	3.14693e+06	2.77692e+06	3.73026e+06
Com_2926_pos	Persin	0.601561	-0.733217	0.0223108	1	1.13978	Down	Lipids and lipid-like molecules	Fatty Acyls	Fatty alcohols	3.02431e+07	2.41659e+07	2.83512e+07	2.96872e+07	6.35046e+07	4.64792e+07	4.18137e+07	3.51285e+07
Com_1237_pos	Uric acid	0.595338	-0.74822	0.00164906	1	2.13658	Down	Organoheterocyclic compounds	Imidazopyrimidines	Purines and purine derivatives	2.01787e+06	1.73095e+06	1.58793e+06	2.03134e+06	2.60753e+06	3.58889e+06	2.8651e+06	3.31481e+06
Com_210_neg	Damascenone	0.592207	-0.755826	0.00818103	1	1.90961	Down	Organic oxygen compounds	Organooxygen compounds	Carbonyl compounds	2.51424e+07	2.42385e+07	1.6006e+07	2.36153e+07	4.34042e+07	3.29415e+07	3.19187e+07	4.20246e+07
Com_3114_pos	MG(0:0/22:5(7Z,10Z,13Z,16Z,19Z)/0:0)	0.588158	-0.765724	0.0027499	1	1.19671	Down	Lipids and lipid-like molecules	Glycerolipids	Monoradylglycerols	7.54643e+07	5.83182e+07	6.92585e+07	8.66968e+07	1.39827e+08	1.32289e+08	1.03457e+08	1.17046e+08
Com_1250_neg	Orotidine	0.587449	-0.767465	0.0045156	1	1.57469	Down	Nucleosides, nucleotides, and analogues	Pyrimidine nucleosides	-	3.02009e+06	2.54288e+06	3.21188e+06	2.27634e+06	4.32288e+06	5.5605e+06	3.74719e+06	5.18162e+06
Com_1150_neg	Cardiospermin	0.586055	-0.770892	0.00521814	1	2.08649	Down	Organic oxygen compounds	Organooxygen compounds	Carbohydrates and carbohydrate conjugates	9.33846e+06	9.66145e+06	7.74042e+06	8.72518e+06	1.72192e+07	1.5773e+07	1.13855e+07	1.6138e+07
Com_1996_neg	LysoPG(18:2(9Z,12Z)/0:0)	0.582387	-0.779949	0.0131509	0.9375	1.23349	Down	Lipids and lipid-like molecules	Glycerophospholipids	Glycerophosphoglycerols	1.77122e+07	1.75518e+07	1.55933e+07	2.6315e+07	3.78542e+07	3.65097e+07	2.37788e+07	3.43676e+07
Com_682_neg	Desoxy	0.579284	-0.787658	0.0261142	1	1.12418	Down	Benzenoids	Benzene and substituted derivatives	Methoxybenzenes	861181	543849	887435	782383	1.84484e+06	1.29129e+06	933601	1.23829e+06
Com_3126_pos	MG(0:0/22:4(7Z,10Z,13Z,16Z)/0:0)	0.578447	-0.789744	0.0436459	0.9375	1.00852	Down	Lipids and lipid-like molecules	Glycerolipids	Monoradylglycerols	2.55417e+07	1.75063e+07	3.35912e+07	4.03775e+07	6.64942e+07	4.93501e+07	3.78683e+07	4.8582e+07
Com_2402_pos	Litsenolide C1	0.574998	-0.79837	0.0219303	0.9375	1.21132	Down	Organoheterocyclic compounds	Lactones	Gamma butyrolactones	5.19276e+07	3.48449e+07	4.51508e+07	6.17262e+07	1.05692e+08	7.65214e+07	9.60314e+07	5.85372e+07
Com_1692_pos	Pirbuterol	0.571324	-0.80762	0.0230209	1	2.07461	Down	Organoheterocyclic compounds	Pyridines and derivatives	Hydroxypyridines	2.04723e+08	1.84392e+08	3.27113e+08	3.0858e+08	4.33525e+08	4.62051e+08	4.86158e+08	4.1201e+08
Com_1861_neg	Inosine-5'-diphosphate	0.570945	-0.808576	0.00340196	1	2.15647	Down	Nucleosides, nucleotides, and analogues	Purine nucleotides	Purine ribonucleotides	8.92607e+06	6.90974e+06	7.44772e+06	8.53271e+06	1.47028e+07	1.32766e+07	1.09335e+07	1.68127e+07
Com_1706_neg	N-Oleoyl-L-Serine	0.569987	-0.811	0.0134416	0.9375	1.06906	Down	Organic acids and derivatives	Carboxylic acids and derivatives	Amino acids, peptides, and analogues	2.03085e+06	2.34411e+06	2.37153e+06	3.17642e+06	5.66986e+06	4.51119e+06	3.11569e+06	4.11231e+06
Com_742_neg	alpha-Methyl-DL-tryptophan	0.568476	-0.814828	0.0236969	1	1.23212	Down	Organic acids and derivatives	Carboxylic acids and derivatives	Amino acids, peptides, and analogues	4.76738e+06	3.92231e+06	4.46663e+06	3.79526e+06	5.41475e+06	7.47553e+06	1.04498e+07	6.4793e+06
Com_2912_pos	1-Arachidonoylglycerol	0.564938	-0.823835	0.0433896	0.9375	1.0602	Down	Lipids and lipid-like molecules	Glycerolipids	Monoradylglycerols	2.5453e+07	2.02838e+07	2.21485e+07	2.8933e+07	5.75079e+07	5.14508e+07	3.49017e+07	2.75184e+07
Com_3052_pos	N-Arachidonoyl Cysteine	0.564331	-0.825387	0.0125079	1	1.37785	Down	-	-	-	8.55185e+06	8.23214e+06	5.59192e+06	1.02768e+07	1.70105e+07	1.37536e+07	1.39402e+07	1.31566e+07
Com_830_pos	N-Benzyllinoleamide	0.562272	-0.83066	0.0400758	1	1.088	Down	Lipids and lipid-like molecules	Fatty Acyls	Fatty amides	1.30321e+07	8.54694e+06	9.70035e+06	1.31122e+07	1.6165e+07	1.54533e+07	1.61745e+07	3.11576e+07
Com_2280_pos	(+)-Lepadin D	0.562177	-0.830903	0.0272762	1	1.47682	Down	Organoheterocyclic compounds	Quinolidines	-	9.24309e+07	6.44166e+07	8.00361e+07	1.07318e+08	2.07028e+08	1.75998e+08	1.18423e+08	1.10816e+08
Com_2905_pos	MG(0:0/18:2(9Z,12Z)/0:0)	0.561517	-0.832597	0.00935913	1	1.15352	Down	Lipids and lipid-like molecules	Fatty Acyls	Lineolic acids and derivatives	1.93803e+08	1.47973e+08	1.97526e+08	2.35853e+08	4.12023e+08	3.75657e+08	2.43517e+08	3.49267e+08
Com_3020_pos	Eicosa-5,8,11,14-tetraenoic acid 1,3-dihydroxypropan-2-yl ester	0.553995	-0.852054	0.00293488	1	1.20031	Down	Lipids and lipid-like molecules	Endocannabinoids	-	1.22193e+08	1.03296e+08	1.20858e+08	1.62164e+08	2.39394e+08	2.61606e+08	2.10998e+08	2.05898e+08
Com_714_neg	Diethyl tartrate	0.543728	-0.879042	0.0120061	1	2.22431	Down	Organic acids and derivatives	Hydroxy acids and derivatives	Beta hydroxy acids and derivatives	1.63395e+06	2.45945e+06	2.50689e+06	2.39555e+06	4.8413e+06	5.17791e+06	3.5263e+06	2.99921e+06
Com_537_neg	5-Methylnicotinamide	0.54073	-0.887021	0.00253213	1	2.10186	Down	Organoheterocyclic compounds	Pyridines and derivatives	Pyridinecarboxylic acids and derivatives	2.62552e+06	3.65112e+06	2.86942e+06	2.4521e+06	5.86031e+06	5.23933e+06	5.45632e+06	4.89314e+06
Com_1861_pos	5-Nonyltetrahydro-2-oxo-3-furancarboxylic acid	0.538301	-0.893515	0.0161593	1	1.70931	Down	Organoheterocyclic compounds	Lactones	Gamma butyrolactones	2.06721e+06	1.22502e+06	1.08444e+06	1.72719e+06	2.79757e+06	2.14392e+06	2.72589e+06	3.67173e+06
Com_839_pos	Palmitoylcarnitine	0.529298	-0.917849	0.0118301	1	1.43185	Down	Lipids and lipid-like molecules	Fatty Acyls	Fatty acid esters	5.06646e+06	4.68261e+06	3.74344e+06	5.69108e+06	1.21544e+07	9.8714e+06	6.5572e+06	7.6605e+06
Com_3340_pos	LysoPC(18:2(9Z,12Z)/0:0)	0.527505	-0.922744	0.00783217	1	1.04736	Down	Lipids and lipid-like molecules	Glycerophospholipids	Glycerophosphocholines	3.46678e+07	4.01613e+07	3.52049e+07	5.96092e+07	6.93097e+07	9.79713e+07	9.03723e+07	6.39425e+07
Com_1336_neg	gamma-Glutamyl-beta-(isoxazolin-5-on-2-yl)alanine	0.524446	-0.931134	0.00986735	1	1.74255	Down	Organic acids and derivatives	Carboxylic acids and derivatives	Amino acids, peptides, and analogues	6.5006e+06	5.74707e+06	5.09027e+06	6.54409e+06	9.34721e+06	1.09142e+07	1.59902e+07	9.28601e+06
Com_2820_pos	Hierridin B	0.523031	-0.935033	0.0308556	0.9375	1.12136	Down	Benzenoids	Phenols	Methoxyphenols	8.2243e+06	7.68913e+06	9.90806e+06	1.1122e+07	2.5212e+07	1.70474e+07	1.07193e+07	1.76548e+07
Com_1553_pos	carbidopa	0.517853	-0.949387	6.28305e-05	1	1.80163	Down	Phenylpropanoids and polyketides	Phenylpropanoic acids	-	1.8932e+08	2.09773e+08	2.01015e+08	1.67037e+08	4.00543e+08	3.68815e+08	3.79782e+08	3.32258e+08
Com_1763_neg	S-inosyl-L-homocysteine	0.516928	-0.951964	1.72297e-05	1	2.07679	Down	Nucleosides, nucleotides, and analogues	5'-deoxyribonucleosides	5'-deoxy-5'-thionucleosides	1.28187e+07	1.07858e+07	1.22889e+07	1.2067e+07	2.46983e+07	2.472e+07	2.12888e+07	2.20723e+07
Com_1452_neg	2-Methoxyoctadecanoic acid	0.516721	-0.952544	0.0399562	0.9375	1.51796	Down	Lipids and lipid-like molecules	Fatty Acyls	Fatty acids and conjugates	3.24499e+06	4.30718e+06	2.43961e+06	6.95094e+06	8.9235e+06	8.79424e+06	5.75162e+06	9.31961e+06
Com_987_neg	2-(1,2,3,4-Tetrahydroxybutyl)thiazolidine-4-carboxylic acid	0.513288	-0.962159	0.0133866	0.9375	1.96273	Down	Organic acids and derivatives	Carboxylic acids and derivatives	Amino acids, peptides, and analogues	5.5097e+06	4.13395e+06	4.43048e+06	3.52739e+06	8.3937e+06	5.50813e+06	9.45176e+06	1.09381e+07
Com_16_neg	Threonic acid	0.509566	-0.972659	0.0139127	1	1.67438	Down	Organic oxygen compounds	Organooxygen compounds	Carbohydrates and carbohydrate conjugates	1.04962e+08	8.50702e+07	1.16978e+08	1.01614e+08	2.51455e+08	1.88338e+08	1.30784e+08	2.31328e+08
Com_2586_pos	Piptamine(antibiotic)	0.508229	-0.976449	0.0297315	1	1.74287	Down	Benzenoids	Benzene and substituted derivatives	Phenylmethylamines	6.88201e+06	5.13674e+06	6.0282e+06	6.40966e+06	1.70359e+07	1.38722e+07	8.02404e+06	9.18907e+06
Com_1566_neg	Fumimycin	0.50821	-0.976502	0.0283714	0.9375	1.6816	Down	Organic acids and derivatives	Carboxylic acids and derivatives	Amino acids, peptides, and analogues	1.58812e+06	1.97876e+06	1.55658e+06	1.34624e+06	3.91539e+06	3.92637e+06	1.84221e+06	3.04639e+06
Com_3053_pos	Miltefosine	0.502051	-0.994093	0.0342653	0.9375	1.42066	Down	Organic nitrogen compounds	Organonitrogen compounds	Quaternary ammonium salts	3.47237e+06	2.26884e+06	3.58674e+06	5.62166e+06	1.01828e+07	8.93279e+06	4.87418e+06	5.78728e+06
Com_812_neg	Hexahydro-2',4-dimethylspiro[1,3-dithiolo[4,5-c]furan-2,3'(2'H)-furan]	0.501981	-0.994295	0.0463895	1	2.00453	Down	Organosulfur compounds	Thioacetals	Dithioacetals	1.68738e+06	1.70764e+06	4.61852e+06	3.05033e+06	6.23983e+06	5.13754e+06	4.78181e+06	5.88124e+06
Com_3301_pos	LysoPC(18:1(11Z))	0.499864	-1.00039	0.00222465	1	1.18299	Down	Lipids and lipid-like molecules	Glycerophospholipids	Glycerophosphocholines	2.20455e+09	2.18312e+09	2.21201e+09	1.91836e+09	4.64656e+09	4.75368e+09	3.24339e+09	4.39708e+09
Com_2712_pos	3,6-Dihydroxydecanoylcarnitine	0.498292	-1.00494	0.0472909	1	1.20609	Down	Lipids and lipid-like molecules	Fatty Acyls	Fatty acid esters	8.02133e+06	3.39116e+06	6.44711e+06	1.06531e+07	1.36951e+07	1.53203e+07	1.56102e+07	1.25953e+07
Com_995_neg	Emodin anthrone	0.495884	-1.01192	0.000614365	1	1.95047	Down	Benzenoids	Anthracenes	-	2.47471e+06	2.46207e+06	2.48938e+06	3.42851e+06	5.63164e+06	5.89304e+06	5.81864e+06	4.54622e+06
Com_796_neg	Caiophoraenin	0.491079	-1.02597	0.0488068	0.9375	1.46605	Down	Lipids and lipid-like molecules	Prenol lipids	Terpene lactones	1.81903e+06	1.58092e+06	2.36121e+06	1.07994e+06	2.09589e+06	4.27673e+06	5.13233e+06	2.42578e+06
Com_1229_neg	Muricatacin	0.488208	-1.03443	0.0299815	0.9375	1.25243	Down	Lipids and lipid-like molecules	Fatty Acyls	Fatty alcohols	795929	704344	615112	1.07628e+06	2.09425e+06	2.01454e+06	899701	1.52901e+06
Com_267_neg	Angelicain	0.481059	-1.05572	0.000591408	1	2.66652	Down	Organoheterocyclic compounds	Benzopyrans	1-benzopyrans	1.3977e+06	1.7253e+06	1.36609e+06	1.93016e+06	3.56646e+06	3.58542e+06	3.50861e+06	2.68352e+06
Com_1808_pos	(R)-4'-Deoxyindenestrol	0.480814	-1.05645	0.0357043	0.9375	1.1215	Down	Benzenoids	Indenes and isoindenes	-	3.61901e+06	2.67876e+06	2.9515e+06	7.77386e+06	8.36201e+06	9.20443e+06	1.15448e+07	6.29356e+06
Com_3240_pos	Lyso-PAF C-16	0.479093	-1.06162	0.013601	1	1.54376	Down	Lipids and lipid-like molecules	Glycerophospholipids	Glycerophosphocholines	2.23812e+08	1.50369e+08	2.42019e+08	3.1301e+08	6.47742e+08	4.96876e+08	3.13699e+08	4.81204e+08
Com_1226_neg	Salvirecognone	0.478413	-1.06367	0.0449775	1	1.29337	Down	Lipids and lipid-like molecules	Prenol lipids	Diterpenoids	331332	690612	337705	950205	1.07948e+06	1.54665e+06	1.22507e+06	976955
Com_1597_neg	Dimethisterone	0.478004	-1.06491	0.00605938	1	1.44857	Down	Lipids and lipid-like molecules	Steroids and steroid derivatives	Androstane steroids	2.13041e+06	2.54354e+06	1.41925e+06	2.34592e+06	5.93001e+06	4.57861e+06	3.44425e+06	3.70207e+06
Com_2624_pos	N-Isobutyl-(2E,4E)-octadecadienamide	0.476257	-1.07019	0.0052465	1	1.50529	Down	Lipids and lipid-like molecules	Fatty Acyls	Fatty amides	1.53157e+08	9.9485e+07	1.14496e+08	1.72e+08	3.02653e+08	2.52094e+08	2.10592e+08	3.66692e+08
Com_2099_neg	Oxygambogic acid	0.469916	-1.08953	0.0145217	1	1.6295	Down	Organoheterocyclic compounds	Benzopyrans	1-benzopyrans	1.88e+07	1.572e+07	1.39297e+07	3.119e+07	4.70499e+07	4.79056e+07	3.6954e+07	3.75672e+07
Com_1913_neg	Glycerophospho-N-Palmitoyl Ethanolamine	0.467051	-1.09835	0.0210884	1	1.40714	Down	Lipids and lipid-like molecules	Glycerophospholipids	Glycerophosphoethanolamines	3.80982e+07	4.12679e+07	1.68899e+07	3.24716e+07	6.30258e+07	8.1011e+07	8.35528e+07	4.80282e+07
Com_3041_pos	Aminopentol	0.464944	-1.10487	0.000416672	1	1.71454	Down	Organic nitrogen compounds	Organonitrogen compounds	Amines	4.84465e+08	5.51332e+08	3.91496e+08	5.12842e+08	1.18075e+09	1.0152e+09	1.14524e+09	8.3165e+08
Com_1953_neg	PE(18:1(9Z)/0:0)	0.463921	-1.10805	0.025042	0.9375	1.08416	Down	Lipids and lipid-like molecules	Glycerophospholipids	Glycerophosphoethanolamines	1.51057e+08	8.29743e+07	1.11045e+08	1.56682e+08	3.76772e+08	2.36302e+08	1.53647e+08	3.14839e+08
Com_2224_pos	Trimethoprim	0.463593	-1.10907	0.0112977	1	1.88263	Down	Benzenoids	Phenol ethers	Anisoles	1.66227e+06	1.46054e+06	1.03058e+06	823122	1.71731e+06	2.849e+06	2.9181e+06	3.25024e+06
Com_685_pos	cis-13,16-Docosadienoic acid	0.455523	-1.13441	0.00576613	1	1.54321	Down	Lipids and lipid-like molecules	Fatty Acyls	Fatty acids and conjugates	1.99049e+07	1.33485e+07	1.48056e+07	2.43434e+07	4.1961e+07	3.45377e+07	2.92697e+07	5.31753e+07
Com_1965_neg	Lantanoic acid	0.455087	-1.13579	0.0253663	0.9375	1.14086	Down	Lipids and lipid-like molecules	Prenol lipids	Triterpenoids	1.00483e+06	625839	1.22348e+06	1.65491e+06	3.1416e+06	2.66473e+06	1.41169e+06	2.69012e+06
Com_866_pos	Oleylcarnitine	0.453647	-1.14036	0.0111096	1	1.62667	Down	Lipids and lipid-like molecules	Fatty Acyls	Fatty acid esters	5.65583e+06	7.75583e+06	3.36268e+06	5.33246e+06	1.73634e+07	9.83388e+06	1.02241e+07	1.13099e+07
Com_3048_pos	Irisoquin	0.448837	-1.15574	0.0455174	1	1.18958	Down	Organic oxygen compounds	Organooxygen compounds	Carbonyl compounds	1.64452e+06	1.32582e+06	3.74611e+06	4.10284e+06	8.46843e+06	6.52433e+06	4.49012e+06	4.62227e+06
Com_1774_pos	(-)-Carbovir	0.447586	-1.15976	0.0451821	0.9375	1.53944	Down	Nucleosides, nucleotides, and analogues	Nucleoside and nucleotide analogues	Cyclopentyl nucleosides	1.12467e+07	7.55719e+06	1.00377e+07	5.39591e+06	1.31859e+07	2.21902e+07	3.04523e+07	1.06652e+07
Com_1942_neg	Myrrhanol B	0.43901	-1.18768	0.0140455	1	1.6297	Down	Lipids and lipid-like molecules	Prenol lipids	Triterpenoids	3.60501e+06	5.87652e+06	3.5509e+06	7.80962e+06	1.07092e+07	1.48092e+07	1.16669e+07	1.02899e+07
Com_1813_neg	Isoiguesterin	0.437958	-1.19113	0.0444157	0.9375	1.35272	Down	Organic oxygen compounds	Organooxygen compounds	Carbonyl compounds	421963	588383	501589	1.62534e+06	1.53859e+06	2.25213e+06	1.73334e+06	1.63936e+06
Com_879_pos	beta-Boswellic acid	0.433724	-1.20515	0.0236885	1	1.57071	Down	Lipids and lipid-like molecules	Prenol lipids	Triterpenoids	2.26195e+06	3.99556e+06	1.70107e+06	4.54386e+06	6.63603e+06	8.76717e+06	7.68238e+06	5.74021e+06
Com_1590_neg	Oleoyl glycine	0.426166	-1.23051	0.00268684	1	1.39615	Down	Organic acids and derivatives	Carboxylic acids and derivatives	Amino acids, peptides, and analogues	1.67931e+06	1.64199e+06	2.21197e+06	2.81117e+06	5.42258e+06	5.66406e+06	3.37448e+06	5.1191e+06
Com_3257_pos	1-O-hexadecyl-2-C-methyl-3-phosphatidylcholine	0.421964	-1.24481	0.0353266	0.9375	1.43917	Down	Lipids and lipid-like molecules	Glycerophospholipids	Glycerophosphocholines	1.39387e+07	9.04504e+06	1.58754e+07	1.91069e+07	5.74988e+07	3.26231e+07	1.78628e+07	2.93872e+07
Com_1917_neg	Soyasapogenol B	0.420555	-1.24964	0.0467345	0.9375	1.54069	Down	Lipids and lipid-like molecules	Prenol lipids	Triterpenoids	917004	878048	689907	2.97611e+06	3.22279e+06	3.81698e+06	3.24135e+06	2.70427e+06
Com_1912_neg	16:0 LYSO-PE	0.419033	-1.25486	0.049601	0.8125	1.36035	Down	Lipids and lipid-like molecules	Glycerophospholipids	Glycerophosphoethanolamines	2.00544e+07	1.36692e+07	1.99933e+07	2.19516e+07	5.76257e+07	4.14763e+07	1.9566e+07	6.19107e+07
Com_1601_neg	Stearoylglycine	0.407087	-1.29659	0.048436	0.875	1.28849	Down	Organic acids and derivatives	Carboxylic acids and derivatives	Amino acids, peptides, and analogues	1.51813e+06	1.11057e+06	1.85909e+06	1.88516e+06	5.442e+06	2.89956e+06	1.80043e+06	5.51301e+06
Com_2693_pos	MG(16:1(9Z)/0:0/0:0)	0.406582	-1.29838	0.0290493	0.875	1.05354	Down	Lipids and lipid-like molecules	Glycerolipids	Monoradylglycerols	1.41484e+06	1.1422e+06	1.54275e+06	3.8736e+06	7.39422e+06	5.21851e+06	3.80021e+06	3.19783e+06
Com_844_pos	Methyl cholate	0.402748	-1.31205	0.02785	1	1.22217	Down	Lipids and lipid-like molecules	Steroids and steroid derivatives	Bile acids, alcohols and derivatives	7.95527e+06	6.82317e+06	7.10043e+06	6.99795e+06	2.45926e+07	2.3545e+07	1.32833e+07	1.02786e+07
Com_1225_neg	1,3-Di-O-[2',2'-di-(p-phenylene) isopropylidene] glycerol	0.402118	-1.31431	0.0137023	1	1.73867	Down	Organic oxygen compounds	Organooxygen compounds	Ethers	380011	295975	308128	446860	786553	865673	1.37492e+06	531448
Com_1693_neg	N-Palmitoyltaurine	0.395411	-1.33858	0.0173834	0.9375	1.58163	Down	Lipids and lipid-like molecules	Fatty Acyls	Fatty amides	4.25555e+06	2.6815e+06	3.41551e+06	5.52705e+06	1.25075e+07	1.26362e+07	5.01742e+06	9.99864e+06
Com_2603_pos	MG(0:0/i-15:0/0:0)	0.393303	-1.34629	0.000112339	1	2.23893	Down	Lipids and lipid-like molecules	Glycerolipids	Monoradylglycerols	1.31716e+08	1.17787e+08	1.14208e+08	1.14308e+08	2.85459e+08	2.8882e+08	3.66351e+08	2.74767e+08
Com_1910_neg	LysoPE(16:1(9Z)/0:0)	0.384295	-1.37972	0.000518727	1	1.77279	Down	Lipids and lipid-like molecules	Glycerophospholipids	Glycerophosphoethanolamines	8.73049e+06	7.38919e+06	5.84465e+06	9.47875e+06	2.38453e+07	1.70482e+07	2.18703e+07	1.90564e+07
Com_3285_pos	1-heptadecanoyl-sn-glycero-3-phosphocholine	0.383495	-1.38272	0.0318142	0.9375	1.38038	Down	Lipids and lipid-like molecules	Glycerophospholipids	Glycerophosphocholines	2.64165e+07	1.66348e+07	2.51822e+07	3.18169e+07	9.56903e+07	6.75979e+07	2.84827e+07	6.91202e+07
Com_3372_pos	LysoPC(22:6(4Z,7Z,10Z,13Z,16Z,19Z)/0:0)	0.375259	-1.41404	0.00138423	1	1.15087	Down	Lipids and lipid-like molecules	Glycerophospholipids	Glycerophosphocholines	1.37079e+07	1.85659e+07	1.54433e+07	2.14495e+07	4.99943e+07	6.1853e+07	3.70718e+07	3.53978e+07
Com_3277_pos	PC(17:1(10Z)/0:0)	0.371288	-1.42939	0.00202338	1	1.01662	Down	Lipids and lipid-like molecules	Glycerophospholipids	Glycerophosphocholines	2.79945e+07	2.92948e+07	2.89773e+07	4.47187e+07	6.60271e+07	1.21624e+08	9.56967e+07	6.94387e+07
Com_804_pos	Tetradecanoylcarnitine	0.365565	-1.4518	0.0220729	1	1.32143	Down	Lipids and lipid-like molecules	Fatty Acyls	Fatty acid esters	1.6429e+06	724521	1.48314e+06	2.8439e+06	6.22964e+06	5.10941e+06	2.9794e+06	3.99415e+06
Com_1734_pos	Glu-Pro	0.350278	-1.51343	0.0121163	1	2.07642	Down	Organic acids and derivatives	Carboxylic acids and derivatives	Amino acids, peptides, and analogues	1.53832e+08	8.76018e+07	6.15617e+07	6.41403e+07	2.60534e+08	2.51551e+08	2.86576e+08	2.49464e+08
Com_146_neg	5-methoxy-L-tryptophan	0.287475	-1.79849	0.0218794	1	1.52835	Down	Organoheterocyclic compounds	Indoles and derivatives	Tryptamines and derivatives	727192	1.1256e+06	1.19611e+06	1.68905e+06	2.01089e+06	2.89359e+06	8.16658e+06	3.41023e+06
Com_736_neg	(S)-3-[(Cyanophenylmethyl)amino]-3-oxopropanoic acid	0.287008	-1.80084	0.00698839	1	2.17448	Down	Benzenoids	Benzene and substituted derivatives	-	720577	1.65782e+06	1.57495e+06	2.31727e+06	4.48705e+06	5.73972e+06	3.51348e+06	8.10801e+06
Com_214_pos	L-Prolylglycine	0.277184	-1.85109	0.025892	1	2.02218	Down	Organic acids and derivatives	Carboxylic acids and derivatives	Amino acids, peptides, and analogues	8.17901e+06	9.41232e+06	7.40812e+06	9.278e+06	2.20339e+07	1.81039e+07	6.29289e+07	2.05965e+07
Com_3382_pos	LysoPC(22:2(13Z,16Z)/0:0)	0.271207	-1.88253	0.0454418	0.9375	1.32391	Down	Lipids and lipid-like molecules	Glycerophospholipids	Glycerophosphocholines	177320	681519	1.27316e+06	716011	4.36725e+06	3.26131e+06	943743	1.92894e+06
Com_847_pos	beta-Amyrone	0.265965	-1.91069	0.0216072	0.9375	1.28539	Down	Lipids and lipid-like molecules	Prenol lipids	Triterpenoids	438880	130885	150143	377098	970690	1.50708e+06	1.26635e+06	380501
Com_2356_pos	MG(0:0/i-13:0/0:0)	0.24288	-2.04168	4.70771e-05	1	2.59602	Down	Lipids and lipid-like molecules	Glycerolipids	Monoradylglycerols	6.43377e+07	4.23277e+07	5.8321e+07	5.13298e+07	2.09678e+08	2.08067e+08	2.60126e+08	2.12759e+08
SP, Streptococcus pneumoniae; GLU, glutamine; FC, fold-change.

## Sheet: Table SV
Table SV. Significantly altered metabolites between FCP_SP and SP groups.
Compound_ID	Name	FC	log2FC	Pvalue	ROC	VIP	Up/downregulation	ClassI	ClassII	ClassIII	all_FCP_SP1	all_FCP_SP2	all_FCP_SP3	all_FCP_SP4	all_SP1	all_SP2	all_SP3	all_SP4
Com_3170_pos	Cycloart-23-ene-3_, 25 diol	4.84891	2.27766	0.011907	0.9375	1.84546	Up	Lipids and lipid-like molecules	Steroids and steroid derivatives	Cycloartanols and derivatives	917812	3.57045e+06	2.99933e+06	2.05854e+06	960026	182561	374349	451782
Com_723_pos	Ethyl linoleate	4.53544	2.18124	0.0434766	1	1.92267	Up	Lipids and lipid-like molecules	Fatty Acyls	Lineolic acids and derivatives	3.23877e+06	2.17221e+06	3.89545e+06	3.46768e+06	1.51434e+06	199132	130343	972698
Com_1471_pos	Prolylproline	4.07247	2.0259	0.0368562	0.9375	1.65864	Up	Organic acids and derivatives	Carboxylic acids and derivatives	Amino acids, peptides, and analogues	1.67457e+09	5.70819e+09	5.25887e+09	1.23951e+09	5.73897e+08	7.20587e+08	1.64614e+09	4.67907e+08
Com_1894_neg	Gibberoketosterol B	3.53486	1.82165	0.0230295	1	1.81711	Up	Lipids and lipid-like molecules	Steroids and steroid derivatives	Ergostane steroids	5.92947e+06	1.5317e+07	1.54043e+07	4.93623e+06	3.66893e+06	3.6501e+06	2.10373e+06	2.34206e+06
Com_3147_pos	MG(0:0/22:1(13Z)/0:0)	2.96855	1.56976	0.0343356	1	1.14194	Up	Lipids and lipid-like molecules	Glycerolipids	Monoradylglycerols	2.56787e+07	1.85589e+07	2.81533e+07	2.51421e+07	1.36515e+07	7.81217e+06	2.65368e+06	8.73807e+06
Com_1655_pos	Aspartyl-Cysteine	2.79584	1.48328	0.0275524	0.9375	1.29891	Up	Organic acids and derivatives	Carboxylic acids and derivatives	Amino acids, peptides, and analogues	2.06744e+07	2.68154e+07	3.03594e+07	1.29074e+07	3.92029e+06	7.96477e+06	1.58732e+07	4.70301e+06
Com_229_neg	D-Erythrose 4-phosphate	2.69934	1.43261	0.00049123	1	1.95365	Up	Organic oxygen compounds	Organooxygen compounds	Carbohydrates and carbohydrate conjugates	6.14339e+08	5.39807e+08	5.17697e+08	5.60383e+08	1.80351e+08	2.11579e+08	2.58977e+08	1.76046e+08
Com_1992_neg	Cytochalasin M	2.5584	1.35524	0.0334115	0.9375	1.23477	Up	Phenylpropanoids and polyketides	Macrolides and analogues	-	5.61164e+06	1.13166e+07	1.20851e+07	6.97461e+06	1.63441e+06	2.57113e+06	6.96145e+06	2.89959e+06
Com_2997_pos	(6Z)-Hexadecenoylcarnitine	2.51098	1.32825	0.0139707	0.9375	1.52985	Up	Lipids and lipid-like molecules	Fatty Acyls	Fatty acid esters	2.59746e+06	6.26153e+06	4.58511e+06	3.23255e+06	2.62006e+06	1.29447e+06	1.59781e+06	1.12916e+06
Com_554_pos	D-Fructose-6-phosphate	2.42369	1.27721	0.0114649	1	1.80563	Up	Organic oxygen compounds	Organooxygen compounds	Carbohydrates and carbohydrate conjugates	7.27774e+07	6.60845e+07	6.86693e+07	6.18726e+07	1.98737e+07	3.16178e+07	3.99292e+07	1.97336e+07
Com_2678_pos	C2-dihydroceramide	2.32701	1.21848	0.0287663	1	1.21559	Up	Lipids and lipid-like molecules	Sphingolipids	Ceramides	1.07134e+06	1.19765e+06	872677	931622	638400	203688	499904	408450
Com_3103_pos	MG(0:0/22:6(4Z,7Z,10Z,13Z,16Z,19Z)/0:0)	2.28204	1.19032	0.0239845	1	1.4236	Up	Lipids and lipid-like molecules	Glycerolipids	Monoradylglycerols	3.57556e+07	8.72939e+07	6.22674e+07	3.94168e+07	2.74578e+07	2.76664e+07	2.66839e+07	1.66713e+07
Com_816_pos	Calcidiol	2.27373	1.18506	0.0227975	1	2.23646	Up	Lipids and lipid-like molecules	Steroids and steroid derivatives	Vitamin D and derivatives	9.59511e+07	9.33318e+07	1.30366e+08	9.48513e+07	6.69535e+07	5.15868e+07	2.35647e+07	4.01945e+07
Com_1328_neg	Methyl-3-[(2-nitrobenzoyl)amino]benzoate	2.27192	1.18391	0.0081116	1	1.74875	Up	Benzenoids	Benzene and substituted derivatives	Anilides	7.41776e+07	7.46494e+07	9.00626e+07	7.00766e+07	4.66302e+07	3.37235e+07	2.18347e+07	3.38052e+07
Com_228_neg	Galactose 1-phosphate	2.23275	1.15882	0.00211851	1	1.87001	Up	Organic oxygen compounds	Organooxygen compounds	Carbohydrates and carbohydrate conjugates	4.02262e+08	5.18369e+08	5.00451e+08	4.51151e+08	1.64642e+08	2.25417e+08	2.70843e+08	1.77629e+08
Com_2776_pos	(3R)-3,21-dihydroxyhenicosanoic acid	2.15302	1.10636	0.0477508	1	1.62921	Up	Lipids and lipid-like molecules	Fatty Acyls	Fatty acids and conjugates	4.95674e+07	5.21076e+07	3.51476e+07	4.02573e+07	2.52329e+07	1.05052e+07	1.23847e+07	3.41245e+07
Com_3039_pos	MG(0:0/20:2(11Z,14Z)/0:0)	2.1356	1.09464	0.0265562	1	1.29371	Up	Lipids and lipid-like molecules	Endocannabinoids	-	2.87791e+08	4.35728e+08	3.70967e+08	2.39407e+08	2.23754e+08	1.24005e+08	8.49458e+07	1.91894e+08
Com_541_pos	Aspartylphenylalanine	2.1276	1.08923	0.0214569	0.9375	1.48784	Up	Organic acids and derivatives	Carboxylic acids and derivatives	Amino acids, peptides, and analogues	1.08386e+09	1.92794e+09	1.33038e+09	9.05956e+08	4.50013e+08	5.76744e+08	9.93919e+08	4.4601e+08
Com_3126_pos	MG(0:0/22:4(7Z,10Z,13Z,16Z)/0:0)	2.07584	1.05369	0.032923	1	1.15527	Up	Lipids and lipid-like molecules	Glycerolipids	Monoradylglycerols	7.20053e+07	1.56058e+08	1.22958e+08	6.89093e+07	6.64942e+07	4.93501e+07	3.78683e+07	4.8582e+07
Com_1526_neg	Fortunolide B	2.04459	1.03181	0.0224681	0.9375	1.37667	Up	Lipids and lipid-like molecules	Prenol lipids	Terpene lactones	5.17915e+06	6.33663e+06	1.06028e+07	6.596e+06	3.65145e+06	2.93411e+06	2.22031e+06	5.23829e+06
Com_638_pos	Oleic acid	2.0364	1.02602	0.00890636	1	1.27323	Up	Lipids and lipid-like molecules	Fatty Acyls	Fatty acids and conjugates	3.24132e+06	4.73378e+06	4.44904e+06	4.56208e+06	2.7964e+06	1.65521e+06	1.48662e+06	2.40308e+06
Com_2722_pos	1,2-dihydroxyheptadec-16-yn-4-yl acetate	2.01067	1.00768	0.0184661	1	1.55552	Up	Lipids and lipid-like molecules	Fatty Acyls	Fatty alcohols	5.54645e+07	9.46919e+07	6.96247e+07	4.42111e+07	3.91537e+07	2.70458e+07	3.31108e+07	3.19853e+07
Com_1585_neg	5-AMINOIMIDAZOLE-4-CARBOXAMIDE-1-BETA-D-RIBOFURANOSYL 5'-MONOPHOSPHATE	1.93117	0.949475	0.0187973	1	1.76718	Up	Nucleosides, nucleotides, and analogues	Imidazole ribonucleosides and ribonucleotides	1-ribosyl-imidazolecarboxamides	1.2057e+07	6.01905e+06	8.30147e+06	9.50424e+06	4.7259e+06	5.09794e+06	4.53912e+06	4.21735e+06
Com_714_pos	Ethyl linolenate	1.91599	0.938087	0.0348179	0.9375	1.40869	Up	Lipids and lipid-like molecules	Fatty Acyls	Lineolic acids and derivatives	3.04673e+07	5.7628e+07	6.94256e+07	4.10859e+07	3.35459e+07	2.78716e+07	1.82227e+07	2.40176e+07
Com_1763_pos	alpha-Asp-Ile	1.85355	0.890291	0.0192565	0.9375	1.49476	Up	Organic acids and derivatives	Carboxylic acids and derivatives	Amino acids, peptides, and analogues	3.92332e+09	4.60204e+09	4.7687e+09	3.37796e+09	1.68003e+09	2.08236e+09	3.43165e+09	1.8006e+09
Com_1115_pos	Taurine	1.84431	0.883078	0.00567727	1	1.70194	Up	Organic acids and derivatives	Organic sulfonic acids and derivatives	Organosulfonic acids and derivatives	1.12118e+08	6.81477e+07	8.09241e+07	8.84635e+07	5.26274e+07	4.50942e+07	4.28504e+07	4.90133e+07
Com_638_neg	Diisopropylphosphate	1.83898	0.878903	0.00819552	1	1.8939	Up	Organic acids and derivatives	Organic phosphoric acids and derivatives	Phosphate esters	6.37109e+06	8.6397e+06	6.78769e+06	6.90386e+06	2.86305e+06	5.09378e+06	4.18974e+06	3.46121e+06
Com_1286_neg	(all-E)-1,7-bis(4-hydroxyphenyl)-1,4,6-heptatrien-3-one	1.81458	0.859633	0.0494146	1	1.74328	Up	Phenylpropanoids and polyketides	Diarylheptanoids	Linear diarylheptanoids	6.12122e+06	4.38353e+06	3.46194e+06	4.6826e+06	2.50578e+06	3.17888e+06	3.27059e+06	1.32222e+06
Com_1965_pos	Aspartyl-Methionine	1.80833	0.854661	0.04909	0.875	1.32059	Up	Organic acids and derivatives	Carboxylic acids and derivatives	Amino acids, peptides, and analogues	7.59123e+08	1.04595e+09	1.01389e+09	6.80102e+08	3.15158e+08	4.56473e+08	8.20166e+08	3.43172e+08
Com_814_pos	12-Epinapelline	1.79947	0.847569	0.03833	0.9375	1.32197	Up	Lipids and lipid-like molecules	Prenol lipids	Diterpenoids	9.14618e+06	1.54455e+07	1.03693e+07	6.83911e+06	5.11977e+06	7.2296e+06	5.49619e+06	5.38364e+06
Com_2619_pos	N6-Isopentenyladenosine	1.76701	0.821313	0.0181547	0.9375	1.64754	Up	Nucleosides, nucleotides, and analogues	Purine nucleosides	-	1.17323e+08	1.69e+08	1.73832e+08	1.31847e+08	7.01923e+07	7.97891e+07	1.21976e+08	6.30714e+07
Com_597_pos	5-Methoxyuridine	1.76675	0.821101	0.000104899	1	2.52735	Up	Nucleosides, nucleotides, and analogues	Pyrimidine nucleosides	-	4.93224e+07	4.28593e+07	4.29151e+07	4.14877e+07	2.56961e+07	2.36545e+07	2.56247e+07	2.49732e+07
Com_1426_neg	Lysyltyrosine	1.76441	0.819184	0.0458469	0.875	1.74002	Up	Organic acids and derivatives	Carboxylic acids and derivatives	Amino acids, peptides, and analogues	3.05812e+07	5.72133e+07	5.5038e+07	3.12658e+07	2.24553e+07	2.02908e+07	3.50747e+07	2.08515e+07
Com_2481_pos	Asp-Trp	1.74433	0.802674	0.043705	0.875	1.27827	Up	Organic acids and derivatives	Carboxylic acids and derivatives	Amino acids, peptides, and analogues	1.83056e+08	2.20959e+08	2.12983e+08	1.59848e+08	7.90275e+07	9.77709e+07	1.83868e+08	8.46882e+07
Com_3029_pos	MG(0:0/20:3(5Z,8Z,11Z)/0:0)	1.73105	0.791649	0.0485414	0.875	1.18491	Up	Lipids and lipid-like molecules	Endocannabinoids	-	3.79012e+08	5.8485e+08	5.80142e+08	3.83814e+08	3.91349e+08	3.3503e+08	2.12066e+08	1.75223e+08
Com_1757_neg	Succinyladenosine	1.71261	0.776195	0.000983552	1	1.90428	Up	Nucleosides, nucleotides, and analogues	Purine nucleosides	-	8.10432e+07	1.01797e+08	9.50403e+07	8.09564e+07	4.98582e+07	5.37847e+07	5.53109e+07	5.05725e+07
Com_600_pos	Monolaurin	1.69846	0.764225	0.000909811	1	1.52613	Up	Lipids and lipid-like molecules	Glycerolipids	Monoradylglycerols	4.24457e+07	4.41831e+07	4.78601e+07	3.70938e+07	2.75106e+07	2.56837e+07	2.06871e+07	2.71412e+07
Com_696_neg	Acetylcarnitine	1.69374	0.760211	0.0256431	1	1.70952	Up	Lipids and lipid-like molecules	Fatty Acyls	Fatty acid esters	6.07007e+07	1.10334e+08	7.79778e+07	7.72724e+07	4.89799e+07	4.79544e+07	4.90977e+07	4.66101e+07
Com_286_pos	3-(3,4-Dihydroxyphenyl)lactic acid	1.65976	0.730978	0.000236958	1	1.80404	Up	Phenylpropanoids and polyketides	Phenylpropanoic acids	-	9.08287e+07	7.36483e+07	7.75806e+07	8.53252e+07	5.36183e+07	4.89481e+07	4.62406e+07	4.84397e+07
Com_1237_neg	Glycylprolylhydroxyproline	1.65091	0.72326	0.00730994	1	1.59064	Up	Organic acids and derivatives	Carboxylic acids and derivatives	Amino acids, peptides, and analogues	3.01794e+07	4.16173e+07	4.07019e+07	3.83262e+07	1.94906e+07	2.18319e+07	2.99892e+07	2.00469e+07
Com_742_neg	alpha-Methyl-DL-tryptophan	1.63423	0.70861	0.037395	0.875	1.07264	Up	Organic acids and derivatives	Carboxylic acids and derivatives	Amino acids, peptides, and analogues	9.38639e+06	1.49427e+07	1.45572e+07	9.84526e+06	5.41475e+06	7.47553e+06	1.04498e+07	6.4793e+06
Com_927_pos	Citicoline	1.6229	0.698577	0.00987253	1	1.17691	Up	Nucleosides, nucleotides, and analogues	Pyrimidine nucleotides	Pyrimidine ribonucleotides	1.04288e+08	8.37769e+07	1.05322e+08	6.94206e+07	4.71055e+07	5.48936e+07	5.37536e+07	6.78021e+07
Com_1587_pos	Lauramine oxide	1.62179	0.697591	0.0174563	1	1.36364	Up	Organic nitrogen compounds	Organonitrogen compounds	Aminoxides	3.60119e+09	4.64043e+09	5.21467e+09	4.04139e+09	3.32985e+09	3.11534e+09	2.34839e+09	1.9955e+09
Com_90_neg	D-Gluconic Acid	1.61019	0.68723	0.00403891	1	1.59183	Up	Organic oxygen compounds	Organooxygen compounds	Carbohydrates and carbohydrate conjugates	3.82996e+08	2.67898e+08	3.00889e+08	2.78371e+08	2.06406e+08	1.71713e+08	1.75434e+08	2.10429e+08
Com_771_pos	2-Palmitoylglycerol	1.60375	0.681451	0.0197416	1	1.30937	Up	Lipids and lipid-like molecules	Glycerolipids	Monoradylglycerols	3.2573e+09	3.44519e+09	2.96342e+09	2.76753e+09	2.57579e+09	1.95694e+09	1.44371e+09	1.77629e+09
Com_1426_pos	Serylproline	1.60017	0.678227	0.00790001	0.9375	2.09761	Up	Organic acids and derivatives	Carboxylic acids and derivatives	Amino acids, peptides, and analogues	1.67411e+08	1.86536e+08	1.88262e+08	1.30168e+08	9.06694e+07	9.35297e+07	1.3151e+08	1.04481e+08
Com_2918_pos	Asp Val Phe	1.59111	0.670032	0.0208971	1	1.73543	Up	Organic acids and derivatives	Carboxylic acids and derivatives	Amino acids, peptides, and analogues	4.91894e+07	4.4833e+07	4.84978e+07	4.65025e+07	2.61397e+07	2.62258e+07	4.07286e+07	2.57053e+07
Com_1323_pos	Dodecylamine	1.56857	0.649448	0.00714113	1	1.7547	Up	Organic nitrogen compounds	Organonitrogen compounds	Amines	6.49043e+07	7.09048e+07	7.5375e+07	6.50649e+07	5.4852e+07	4.44616e+07	3.84826e+07	3.83192e+07
Com_2211_pos	Aspartyl-Arginine	1.55934	0.640932	0.0474509	0.9375	1.55562	Up	Organic acids and derivatives	Carboxylic acids and derivatives	Amino acids, peptides, and analogues	1.35421e+08	1.32915e+08	1.47261e+08	1.04336e+08	6.06012e+07	7.91349e+07	1.24285e+08	6.94117e+07
Com_146_pos	Glycylproline	1.55923	0.64083	0.000412828	1	1.86744	Up	Organic acids and derivatives	Carboxylic acids and derivatives	Amino acids, peptides, and analogues	9.21252e+08	1.01177e+09	1.03254e+09	8.72453e+08	6.03824e+08	6.09953e+08	6.95201e+08	5.52511e+08
Com_1578_pos	L-isoleucyl-L-proline	1.54929	0.631606	0.0133819	1	1.94105	Up	Organic acids and derivatives	Carboxylic acids and derivatives	Amino acids, peptides, and analogues	5.3664e+09	6.65883e+09	6.75669e+09	4.93272e+09	3.84997e+09	3.55068e+09	4.86565e+09	3.04048e+09
Com_1553_pos	carbidopa	1.54153	0.624363	0.0201903	1	1.09065	Up	Phenylpropanoids and polyketides	Phenylpropanoic acids	-	4.85536e+08	6.25794e+08	7.10566e+08	4.61724e+08	4.00543e+08	3.68815e+08	3.79782e+08	3.32258e+08
Com_1427_pos	Proclavaminic acid	1.53855	0.621576	0.00286234	1	1.71027	Up	Organoheterocyclic compounds	Lactams	Beta lactams	2.58804e+08	2.23548e+08	2.22561e+08	2.02727e+08	1.25332e+08	1.49458e+08	1.74311e+08	1.4083e+08
Com_2702_pos	Asp Thr Leu	1.52456	0.60839	0.0189916	1	2.13926	Up	Organic acids and derivatives	Carboxylic acids and derivatives	Amino acids, peptides, and analogues	1.81048e+08	1.57685e+08	1.69281e+08	1.50324e+08	9.6376e+07	1.02849e+08	1.43585e+08	8.90127e+07
Com_2508_pos	MG(0:0/14:1(9Z)/0:0)	1.52058	0.604619	0.033791	1	1.21238	Up	Lipids and lipid-like molecules	Glycerolipids	Monoradylglycerols	4.07678e+07	6.64875e+07	6.17846e+07	4.50492e+07	3.36388e+07	3.94683e+07	3.9124e+07	2.85635e+07
Com_2095_pos	Prolyl-tyrosine	1.50288	0.587732	0.00635894	1	1.39509	Up	Organic acids and derivatives	Carboxylic acids and derivatives	Amino acids, peptides, and analogues	2.30001e+08	2.88366e+08	2.85202e+08	2.71876e+08	1.64693e+08	1.91585e+08	2.10896e+08	1.48415e+08
Com_1354_pos	Ala-Val	0.661371	-0.596468	0.0122146	0.9375	1.59759	Down	Organic acids and derivatives	Carboxylic acids and derivatives	Amino acids, peptides, and analogues	2.94557e+09	2.80005e+09	3.07371e+09	4.24102e+09	4.86219e+09	5.32376e+09	5.37129e+09	4.19014e+09
Com_1474_neg	Tryptophyl-Isoleucine	0.657067	-0.605887	0.0384596	0.9375	1.56036	Down	Organic acids and derivatives	Carboxylic acids and derivatives	Amino acids, peptides, and analogues	5.40217e+07	3.54337e+07	3.9635e+07	6.31489e+07	8.45518e+07	7.73342e+07	5.85032e+07	7.21825e+07
Com_1825_pos	Alanyltyrosine	0.65703	-0.605969	0.0108258	0.9375	1.42976	Down	Organic acids and derivatives	Carboxylic acids and derivatives	Amino acids, peptides, and analogues	3.023e+08	3.07875e+08	3.33863e+08	4.49941e+08	5.40502e+08	5.64657e+08	5.73865e+08	4.42612e+08
Com_1416_neg	2-(4-Morpholinyl)-8-phenyl-4H-1-benzopyran-4-one	0.657023	-0.605985	0.023602	1	1.11899	Down	Organoheterocyclic compounds	Benzopyrans	1-benzopyrans	4.12128e+06	4.9235e+06	6.00894e+06	6.96978e+06	7.98064e+06	8.45708e+06	9.76858e+06	7.31385e+06
Com_2321_pos	His Phe	0.655876	-0.608506	0.0170625	0.9375	1.3374	Down	Organic acids and derivatives	Carboxylic acids and derivatives	Amino acids, peptides, and analogues	1.89205e+08	1.57132e+08	1.5246e+08	2.14715e+08	2.83114e+08	2.66887e+08	3.30654e+08	2.07222e+08
Com_2823_pos	Ser Ile Phe	0.655588	-0.609139	0.0203581	1	1.06856	Down	Organic acids and derivatives	Carboxylic acids and derivatives	Amino acids, peptides, and analogues	5.25428e+07	4.5721e+07	4.00216e+07	4.58471e+07	6.32074e+07	7.25851e+07	8.98747e+07	5.5199e+07
Com_1389_neg	Virolanol C	0.65494	-0.610565	0.0140327	1	1.26421	Down	Phenylpropanoids and polyketides	Linear 1,3-diarylpropanoids	Cinnamylphenols	2.87835e+06	2.57851e+06	3.30982e+06	3.7046e+06	5.82558e+06	5.15083e+06	3.9801e+06	4.08534e+06
Com_1099_neg	gamma-Glutamyltyramine	0.653662	-0.613384	0.00405231	1	1.77049	Down	Organic acids and derivatives	Carboxylic acids and derivatives	Amino acids, peptides, and analogues	8.12194e+06	7.76925e+06	9.18141e+06	1.06886e+07	1.57129e+07	1.41919e+07	1.28959e+07	1.19082e+07
Com_1861_neg	Inosine-5'-diphosphate	0.652903	-0.615059	0.0223328	1	1.59579	Down	Nucleosides, nucleotides, and analogues	Purine nucleotides	Purine ribonucleotides	1.02721e+07	6.61528e+06	1.048e+07	9.01601e+06	1.47028e+07	1.32766e+07	1.09335e+07	1.68127e+07
Com_1042_neg	gamma-Glu-Ile	0.651328	-0.618544	0.0266293	1	1.39933	Down	Organic acids and derivatives	Carboxylic acids and derivatives	Amino acids, peptides, and analogues	3.56386e+09	4.54782e+09	4.86364e+09	6.41518e+09	6.50977e+09	8.00348e+09	8.11826e+09	7.13919e+09
Com_1071_neg	Triethylene glycol diglycidyl ether	0.644945	-0.632752	0.0222571	1	1.56088	Down	Organoheterocyclic compounds	Epoxides	-	4.22882e+07	4.53656e+07	5.33106e+07	7.15709e+07	7.22981e+07	8.90746e+07	8.93895e+07	7.87782e+07
Com_1823_pos	Phenylalanylserine	0.644199	-0.634421	0.047473	0.9375	1.3517	Down	Organic acids and derivatives	Carboxylic acids and derivatives	Amino acids, peptides, and analogues	1.17503e+09	9.69464e+08	1.04735e+09	1.28132e+09	1.63428e+09	1.84321e+09	2.28205e+09	1.18421e+09
Com_3079_pos	Arg Glu Leu	0.643661	-0.635627	0.0299122	0.9375	1.28516	Down	Organic acids and derivatives	Carboxylic acids and derivatives	Amino acids, peptides, and analogues	7.35681e+07	9.34777e+07	7.39536e+07	1.26617e+08	1.53706e+08	1.09477e+08	1.57777e+08	1.50173e+08
Com_1523_neg	Sinapoyltartronate	0.64317	-0.636729	0.0144789	1	1.13372	Down	Phenylpropanoids and polyketides	Cinnamic acids and derivatives	Hydroxycinnamic acids and derivatives	6.35919e+06	7.86622e+06	8.11817e+06	8.87529e+06	1.45173e+07	1.34185e+07	1.13618e+07	9.24148e+06
Com_2544_pos	H-Tyr-Phe-OH	0.642406	-0.638442	0.0179484	0.9375	1.19014	Down	Organic acids and derivatives	Carboxylic acids and derivatives	Amino acids, peptides, and analogues	7.94265e+07	6.7166e+07	7.39129e+07	1.08785e+08	1.3139e+08	1.41644e+08	1.42259e+08	9.72961e+07
Com_2427_pos	Phenylalanylphenylalanine	0.641461	-0.640567	0.0155405	0.9375	1.13679	Down	Organic acids and derivatives	Carboxylic acids and derivatives	Amino acids, peptides, and analogues	1.23068e+08	1.56625e+08	1.50246e+08	2.03858e+08	2.51489e+08	2.67746e+08	2.76091e+08	1.92726e+08
Com_375_pos	Cyclic N-Acetyl-D-mannosamine	0.641256	-0.641027	0.00394452	1	1.52493	Down	Organic oxygen compounds	Organooxygen compounds	Carbohydrates and carbohydrate conjugates	1.78818e+08	1.6016e+08	1.67788e+08	2.22481e+08	2.63618e+08	2.44187e+08	3.24956e+08	3.04455e+08
Com_1673_neg	Asn Ile Leu	0.640881	-0.641873	0.0314102	0.9375	1.22514	Down	Organic acids and derivatives	Carboxylic acids and derivatives	Amino acids, peptides, and analogues	1.96474e+08	1.26726e+08	1.22805e+08	1.6799e+08	2.8131e+08	1.81762e+08	2.08719e+08	2.86258e+08
Com_1035_neg	Biotin sulfoxide	0.64029	-0.643203	0.0117464	0.9375	1.95707	Down	Organoheterocyclic compounds	Biotin and derivatives	-	1.32059e+07	1.0295e+07	1.1421e+07	1.61811e+07	2.15511e+07	2.20552e+07	1.59289e+07	2.02771e+07
Com_1888_pos	Kanosamine 6-phosphate	0.633614	-0.658323	0.0361985	1	1.51587	Down	Organic oxygen compounds	Organooxygen compounds	Carbohydrates and carbohydrate conjugates	9.03227e+06	1.30722e+07	1.38672e+07	1.81441e+07	1.83391e+07	1.8705e+07	2.46754e+07	2.36887e+07
Com_2426_pos	Tyr Met	0.632094	-0.66179	0.0221089	0.9375	1.14442	Down	Organic acids and derivatives	Carboxylic acids and derivatives	Amino acids, peptides, and analogues	4.98251e+07	3.70496e+07	4.04151e+07	6.40706e+07	8.11788e+07	8.43738e+07	7.82905e+07	5.88976e+07
Com_3028_pos	Ala-Leu-Leu-Ser	0.631709	-0.662668	0.0180099	0.9375	1.12495	Down	Organic acids and derivatives	Carboxylic acids and derivatives	Amino acids, peptides, and analogues	1.16051e+08	9.18772e+07	9.86628e+07	1.55168e+08	1.90045e+08	1.74806e+08	1.54076e+08	2.12041e+08
Com_1626_pos	Norfentanyl	0.630241	-0.666024	0.0185865	0.9375	1.12606	Down	Benzenoids	Benzene and substituted derivatives	Anilides	4.01575e+06	3.43738e+06	3.3372e+06	5.25826e+06	7.12792e+06	7.22161e+06	6.43223e+06	4.68244e+06
Com_353_neg	4-Hydroxylonchocarpin	0.630112	-0.66632	0.0421106	0.9375	1.08545	Down	Phenylpropanoids and polyketides	Linear 1,3-diarylpropanoids	Chalcones and dihydrochalcones	2.91236e+07	5.0975e+07	4.5761e+07	4.8441e+07	5.03914e+07	6.2511e+07	7.25488e+07	9.1167e+07
Com_1061_neg	Lanceolatin B (flavonoid)	0.629623	-0.66744	0.0261632	0.9375	1.7611	Down	Phenylpropanoids and polyketides	Flavonoids	Flavones	2.21984e+08	1.84099e+08	2.27322e+08	3.2363e+08	4.13231e+08	4.66642e+08	3.55875e+08	2.84266e+08
Com_255_pos	Glycylleucine	0.629461	-0.66781	0.0365065	0.9375	1.99116	Down	Organic acids and derivatives	Carboxylic acids and derivatives	Amino acids, peptides, and analogues	6.64934e+07	4.29286e+07	4.42429e+07	4.37619e+07	6.98216e+07	1.11086e+08	7.16801e+07	6.1056e+07
Com_413_pos	Cordycepin	0.627687	-0.671884	0.0229946	1	1.16811	Down	Nucleosides, nucleotides, and analogues	Purine nucleosides	Purine 3'-deoxyribonucleosides	2.95695e+07	2.07425e+07	2.8273e+07	3.71774e+07	5.03123e+07	4.68487e+07	4.38144e+07	4.34516e+07
Com_2836_pos	H-TYR-TRP-OH	0.625957	-0.675865	0.0317185	0.9375	1.27494	Down	Organic acids and derivatives	Carboxylic acids and derivatives	Amino acids, peptides, and analogues	2.52258e+07	1.65897e+07	1.67544e+07	2.88449e+07	3.95442e+07	3.65482e+07	3.47679e+07	2.87894e+07
Com_1116_neg	Leucyl-Histidine	0.621927	-0.685182	0.00730785	1	1.74395	Down	Organic acids and derivatives	Carboxylic acids and derivatives	Amino acids, peptides, and analogues	7.84511e+07	7.88842e+07	7.94254e+07	1.06238e+08	1.37892e+08	1.39202e+08	1.37024e+08	1.3739e+08
Com_1533_neg	Phenylalanyltyrosine	0.6191	-0.691757	0.00631147	1	1.27171	Down	Organic acids and derivatives	Carboxylic acids and derivatives	Amino acids, peptides, and analogues	1.5797e+07	1.42197e+07	1.49331e+07	2.01621e+07	2.86586e+07	3.08519e+07	2.47647e+07	2.08965e+07
Com_3090_pos	Arg Asp Met	0.618275	-0.693678	0.013544	1	1.69669	Down	Organic acids and derivatives	Peptidomimetics	Hybrid peptides	1.73996e+08	1.80696e+08	1.9265e+08	2.7761e+08	2.96793e+08	3.39177e+08	3.40377e+08	3.57933e+08
Com_242_neg	Phenylalanylvaline	0.614928	-0.701511	0.0196179	1	1.51315	Down	Organic acids and derivatives	Carboxylic acids and derivatives	Amino acids, peptides, and analogues	1.32321e+08	9.75351e+07	1.07848e+08	1.71884e+08	2.17134e+08	2.29391e+08	1.76365e+08	2.05806e+08
Com_1529_pos	Alanylmethionine	0.611573	-0.709403	0.0207798	0.9375	1.33593	Down	Organic acids and derivatives	Carboxylic acids and derivatives	Amino acids, peptides, and analogues	2.98374e+08	2.99293e+08	2.71861e+08	4.1582e+08	5.05449e+08	5.56858e+08	6.65342e+08	3.7406e+08
Com_2267_pos	Tyrosyl-Aspartate	0.610971	-0.710823	0.0104689	1	1.76419	Down	Organic acids and derivatives	Carboxylic acids and derivatives	Amino acids, peptides, and analogues	8.91766e+08	7.58052e+08	8.60208e+08	1.20981e+09	1.56176e+09	1.51883e+09	1.61942e+09	1.3884e+09
Com_2474_pos	Histidyltyrosine	0.609948	-0.713242	0.00591798	1	1.47147	Down	Organic acids and derivatives	Carboxylic acids and derivatives	Amino acids, peptides, and analogues	2.25297e+08	1.90791e+08	1.82848e+08	2.73487e+08	3.47416e+08	3.60836e+08	4.24594e+08	2.97477e+08
Com_1607_neg	Tyr-Tyr	0.59709	-0.743981	0.0114996	1	1.40488	Down	Organic acids and derivatives	Carboxylic acids and derivatives	Amino acids, peptides, and analogues	1.18043e+07	8.67488e+06	1.081e+07	1.51585e+07	2.22215e+07	2.02127e+07	1.92904e+07	1.60654e+07
Com_2185_pos	Histidylmethionine	0.595121	-0.748746	0.012748	1	1.49666	Down	Organic acids and derivatives	Carboxylic acids and derivatives	Amino acids, peptides, and analogues	1.19504e+08	8.08816e+07	7.5469e+07	1.15875e+08	1.86503e+08	1.39427e+08	1.78285e+08	1.54021e+08
Com_2200_pos	Arg Leu	0.594882	-0.749324	0.00120117	1	1.29655	Down	Organic acids and derivatives	Carboxylic acids and derivatives	Amino acids, peptides, and analogues	6.20174e+08	5.93345e+08	7.07326e+08	7.93482e+08	1.04752e+09	1.2118e+09	1.30234e+09	1.00113e+09
Com_2618_pos	H-MET-TRP-OH	0.592399	-0.755359	0.0432735	0.9375	1.30589	Down	Organic acids and derivatives	Carboxylic acids and derivatives	Amino acids, peptides, and analogues	1.76527e+07	1.15722e+07	1.32878e+07	2.58809e+07	3.13796e+07	3.23847e+07	2.4799e+07	2.68888e+07
Com_52_neg	1H-Indole-3-acetamide	0.585269	-0.772828	0.00743724	1	1.94376	Down	Organoheterocyclic compounds	Indoles and derivatives	Indoles	2.67082e+06	2.33204e+06	2.79637e+06	3.40604e+06	4.76902e+06	4.23846e+06	3.89445e+06	6.24357e+06
Com_984_neg	Tyrosyl-Alanine	0.582806	-0.778912	0.00140564	1	1.6851	Down	Organic acids and derivatives	Carboxylic acids and derivatives	Amino acids, peptides, and analogues	8.58893e+07	1.04637e+08	9.99856e+07	1.15882e+08	1.75478e+08	1.85407e+08	1.65546e+08	1.70873e+08
Com_2961_pos	Ala-Leu-Val-Ser	0.580012	-0.785845	0.0362982	1	1.63514	Down	Organic acids and derivatives	Carboxylic acids and derivatives	Amino acids, peptides, and analogues	4.6316e+08	2.33923e+08	2.49911e+08	3.82243e+08	5.93711e+08	5.9726e+08	5.75111e+08	5.25658e+08
Com_3200_pos	Asp Arg Tyr	0.569296	-0.812749	0.0468372	0.9375	1.62655	Down	Organic acids and derivatives	Carboxylic acids and derivatives	Amino acids, peptides, and analogues	3.93653e+07	3.27971e+07	3.30599e+07	7.49403e+07	7.04033e+07	8.28305e+07	8.22997e+07	8.09322e+07
Com_2083_neg	7-(1-Methyl-2-oxopropyl)streptonigrin	0.567267	-0.8179	0.0492523	0.9375	1.52894	Down	Organoheterocyclic compounds	Pyridines and derivatives	Bipyridines and oligopyridines	1.18767e+06	898903	731715	505823	1.61832e+06	1.64373e+06	1.6976e+06	900209
Com_2203_pos	C17-Sphinganine	0.566375	-0.82017	0.0497694	0.9375	1.64178	Down	Organic nitrogen compounds	Organonitrogen compounds	Amines	1.53201e+08	1.69162e+08	2.21614e+08	1.51803e+08	1.80013e+08	3.96936e+08	3.69053e+08	2.82477e+08
Com_1980_neg	Lysyl-aspartyl-glutamyl-leucine	0.563306	-0.82801	0.00730619	1	1.26428	Down	Organic acids and derivatives	Carboxylic acids and derivatives	Amino acids, peptides, and analogues	3.36046e+07	3.11944e+07	3.06915e+07	4.92118e+07	6.67179e+07	5.89344e+07	5.17536e+07	7.94747e+07
Com_1294_neg	Phenylalanyllysine	0.559568	-0.837614	0.00701232	1	1.23517	Down	Organic acids and derivatives	Carboxylic acids and derivatives	Amino acids, peptides, and analogues	8.41927e+06	1.07875e+07	9.31217e+06	1.3655e+07	1.9139e+07	1.95092e+07	1.99017e+07	1.68188e+07
Com_1427_neg	Tyrosyl-Lysine	0.55793	-0.841843	0.00409951	1	1.33062	Down	Organic acids and derivatives	Carboxylic acids and derivatives	Amino acids, peptides, and analogues	1.4363e+07	1.60953e+07	1.54318e+07	2.18429e+07	2.92115e+07	3.27876e+07	3.15994e+07	2.78018e+07
Com_2270_pos	H-Phe-Met-OH	0.553724	-0.852762	0.00937367	0.9375	1.21076	Down	Organic acids and derivatives	Carboxylic acids and derivatives	Amino acids, peptides, and analogues	7.28517e+07	7.39402e+07	7.52218e+07	1.15338e+08	1.57715e+08	1.65809e+08	1.77848e+08	1.0787e+08
Com_1765_pos	Isoleucylaspartate	0.552691	-0.855456	0.00784643	1	2.50522	Down	Organic acids and derivatives	Carboxylic acids and derivatives	Amino acids, peptides, and analogues	3.13606e+09	3.23527e+09	3.51916e+09	4.13945e+09	7.68769e+09	4.90564e+09	5.35551e+09	7.43594e+09
Com_1447_pos	2-Oxo-8-methylthiooctanoic acid	0.546004	-0.873015	0.0121615	1	1.19916	Down	Organic acids and derivatives	Keto acids and derivatives	Medium-chain keto acids and derivatives	9.53833e+06	6.71196e+06	5.99498e+06	6.81316e+06	1.24655e+07	1.16746e+07	1.87576e+07	1.03225e+07
Com_2603_pos	MG(0:0/i-15:0/0:0)	0.542002	-0.88363	0.000475845	1	1.40148	Down	Lipids and lipid-like molecules	Glycerolipids	Monoradylglycerols	1.71048e+08	1.48699e+08	1.48765e+08	1.90236e+08	2.85459e+08	2.8882e+08	3.66351e+08	2.74767e+08
Com_1951_pos	Met Leu	0.541773	-0.88424	3.02032e-05	1	1.764	Down	Organic acids and derivatives	Carboxylic acids and derivatives	Amino acids, peptides, and analogues	1.15904e+09	1.15147e+09	9.84784e+08	1.14485e+09	2.16137e+09	2.18515e+09	1.99113e+09	1.85794e+09
Com_2592_pos	(2S,3S)-2-Hydroxytridecane-1,2,3-tricarboxylate	0.541029	-0.886222	0.0273575	1	1.76035	Down	Organic acids and derivatives	Carboxylic acids and derivatives	Tricarboxylic acids and derivatives	2.17291e+07	1.07359e+07	1.04923e+07	1.6765e+07	2.56278e+07	2.85411e+07	2.34896e+07	3.2728e+07
Com_3083_pos	Ala-Leu-Leu-Thr	0.535659	-0.900612	0.00680319	1	1.05716	Down	Organic acids and derivatives	Carboxylic acids and derivatives	Amino acids, peptides, and analogues	1.7562e+07	2.00135e+07	2.03065e+07	2.85722e+07	3.90778e+07	4.18995e+07	3.82191e+07	4.22012e+07
Com_2387_pos	Isopropalin	0.534689	-0.903228	0.0136515	1	1.33265	Down	Benzenoids	Benzene and substituted derivatives	Aniline and substituted anilines	1.4515e+08	2.06715e+08	1.76538e+08	2.69107e+08	3.18166e+08	3.87229e+08	5.03923e+08	2.82224e+08
Com_1300_neg	Tyr Leu	0.533865	-0.905452	0.00525467	1	1.61975	Down	Organic acids and derivatives	Carboxylic acids and derivatives	Amino acids, peptides, and analogues	1.47161e+08	1.11628e+08	1.26304e+08	1.859e+08	3.12657e+08	2.97225e+08	2.02074e+08	2.57591e+08
Com_1851_neg	Lys-Asp-Tyr	0.51916	-0.945748	0.0106031	1	1.47916	Down	Organic acids and derivatives	Carboxylic acids and derivatives	Amino acids, peptides, and analogues	1.25369e+07	7.59959e+06	9.20098e+06	1.32924e+07	2.50984e+07	1.93507e+07	1.44617e+07	2.32022e+07
Com_2450_pos	N-(N-(3-Carboxyoxirane-2-carbonyl)leucyl)isoamylamine	0.517639	-0.949983	0.0262682	0.9375	1.59802	Down	Organic acids and derivatives	Carboxylic acids and derivatives	Amino acids, peptides, and analogues	5.44641e+07	4.61084e+07	2.54173e+07	4.08026e+07	7.85861e+07	8.04213e+07	5.21669e+07	1.11044e+08
Com_454_neg	Aurantiamide	0.517003	-0.951756	0.010077	1	1.88968	Down	Organoheterocyclic compounds	Diazinanes	-	9.18285e+06	5.786e+06	6.71632e+06	1.07652e+07	1.78245e+07	1.61188e+07	1.26541e+07	1.6169e+07
Com_2840_pos	Pro-Val-Gly-Pro	0.513828	-0.960643	0.0100669	0.9375	1.34622	Down	Organic acids and derivatives	Carboxylic acids and derivatives	Amino acids, peptides, and analogues	3.48279e+07	3.4706e+07	2.89076e+07	4.71943e+07	8.37804e+07	7.55555e+07	4.59409e+07	7.81563e+07
Com_1975_pos	Esprocarb	0.506829	-0.980428	0.0120714	1	2.115	Down	Benzenoids	Benzene and substituted derivatives	-	2.23909e+08	1.34537e+08	1.57695e+08	2.44694e+08	3.8955e+08	3.91885e+08	3.30643e+08	3.89089e+08
Com_1780_pos	Threonyllysine	0.50397	-0.98859	0.00864413	1	1.60199	Down	Organic acids and derivatives	Carboxylic acids and derivatives	Amino acids, peptides, and analogues	7.46158e+07	4.65805e+07	5.80601e+07	8.9284e+07	1.45683e+08	1.45442e+08	9.7247e+07	1.44478e+08
Com_1315_neg	Methionyl-Phenylalanine	0.49988	-1.00035	0.00551434	1	1.25391	Down	Organic acids and derivatives	Carboxylic acids and derivatives	Amino acids, peptides, and analogues	1.30065e+07	1.2244e+07	1.25827e+07	2.1156e+07	3.09003e+07	3.42915e+07	2.9828e+07	2.29869e+07
Com_2242_pos	Lysylphenylalanine	0.491454	-1.02487	0.0302321	1	1.38685	Down	Organic acids and derivatives	Carboxylic acids and derivatives	Amino acids, peptides, and analogues	1.17468e+08	1.49348e+08	1.41606e+08	6.45585e+07	1.91905e+08	2.92981e+08	3.17458e+08	1.60063e+08
Com_241_pos	Spermine	0.491212	-1.02558	0.0306873	0.9375	1.12162	Down	Organic nitrogen compounds	Organonitrogen compounds	Amines	4.8032e+08	7.9463e+08	3.18172e+08	4.55422e+08	7.98034e+08	6.94013e+08	1.42328e+09	1.25506e+09
Com_1545_pos	2-Amino-1-methyl-6-phenylimidazo[4,5-b]pyridine	0.489425	-1.03084	0.0140543	1	1.92077	Down	Organoheterocyclic compounds	Pyridines and derivatives	Phenylpyridines	3.04476e+07	2.54118e+07	2.17488e+07	4.59297e+07	5.97687e+07	6.98637e+07	5.53599e+07	6.74216e+07
Com_1797_neg	Etarotene	0.489155	-1.03164	0.0290378	1	1.66304	Down	Phenylpropanoids and polyketides	Stilbenes	-	1.59196e+06	4.07799e+06	3.41411e+06	3.53384e+06	5.38326e+06	6.73776e+06	8.10856e+06	5.56571e+06
Com_2773_pos	Lys Val Leu	0.487892	-1.03537	0.0062608	1	1.10294	Down	Organic acids and derivatives	Carboxylic acids and derivatives	Amino acids, peptides, and analogues	3.20798e+07	2.75432e+07	4.66537e+07	4.76194e+07	9.37931e+07	5.79199e+07	8.33249e+07	8.03929e+07
Com_1696_neg	XANTHOSINE 5'-MONOPHOSPHATE	0.485824	-1.04149	0.0250622	0.9375	1.13447	Down	Nucleosides, nucleotides, and analogues	Purine nucleotides	Purine ribonucleotides	2.687e+08	1.87334e+08	3.76876e+08	2.32222e+08	5.78232e+08	4.81111e+08	3.33169e+08	7.99911e+08
Com_1884_neg	Ceranapril	0.476004	-1.07095	0.0394836	0.9375	1.48545	Down	Organic acids and derivatives	Carboxylic acids and derivatives	Amino acids, peptides, and analogues	295991	561116	725022	255151	1.23739e+06	846093	1.08721e+06	689111
Com_1493_pos	(R)-2-Amino-N-(2,2,4,4-tetramethyl-3-thietanyl)propanamide	0.470139	-1.08884	0.00407887	1	1.5315	Down	Organoheterocyclic compounds	Thietanes	-	3.58158e+06	2.49476e+06	1.95742e+06	3.08032e+06	6.1131e+06	5.50906e+06	7.28068e+06	4.73716e+06
Com_461_neg	Periplogenin	0.467072	-1.09828	0.0201066	1	1.43798	Down	Lipids and lipid-like molecules	Steroids and steroid derivatives	Steroid lactones	2.90729e+06	2.37344e+06	2.25193e+06	5.38042e+06	6.95136e+06	6.70061e+06	5.72967e+06	8.26527e+06
Com_947_neg	1-Hydroxy-6-methoxypyrene	0.463312	-1.10994	0.00284846	1	1.62785	Down	Benzenoids	Pyrenes	-	8.99227e+06	1.42325e+07	1.46246e+07	1.11269e+07	2.0145e+07	2.4611e+07	2.67077e+07	3.42454e+07
Com_1181_neg	Dibenz[a,c]anthracene	0.459199	-1.12281	0.00964332	1	2.25574	Down	Benzenoids	Phenanthrenes and derivatives	Triphenylenes	5.89851e+06	5.11473e+06	6.80919e+06	1.05175e+07	1.55575e+07	1.66879e+07	1.31795e+07	1.62911e+07
Com_1380_pos	3,4-Dimethoxypropiophenone	0.458718	-1.12432	0.00163045	1	1.12114	Down	Organic oxygen compounds	Organooxygen compounds	Carbonyl compounds	1.98491e+06	1.19059e+06	1.57008e+06	1.35819e+06	3.20442e+06	4.14252e+06	3.27692e+06	2.68226e+06
Com_1330_pos	Dimethyl pimelimidate	0.441184	-1.18055	0.00574157	1	1.46833	Down	Organic acids and derivatives	Carboximidic acids and derivatives	Imidoesters	8.56173e+07	6.10115e+07	6.78068e+07	1.04714e+08	1.73299e+08	1.52498e+08	1.34438e+08	2.6316e+08
Com_894_neg	2-Deoxy-D-glucopyranose 6-phosphate	0.439407	-1.18637	0.0238532	1	1.73152	Down	Organic oxygen compounds	Organooxygen compounds	Carbohydrates and carbohydrate conjugates	3.50943e+06	3.81089e+06	4.42148e+06	2.09153e+06	1.16816e+07	9.253e+06	4.92709e+06	5.62008e+06
Com_2110_pos	Dibenzo[a,j]acridine	0.432895	-1.20791	0.009131	1	2.02907	Down	Organoheterocyclic compounds	Quinolines and derivatives	Benzoquinolines	5.66241e+06	1.2263e+07	9.81595e+06	1.17228e+07	2.07287e+07	2.54524e+07	2.74963e+07	1.74861e+07
Com_1161_neg	6,8-Dihydroxy-4-methyl-7H-benz[de]anthracen-7-one	0.42725	-1.22685	0.00728889	1	1.81372	Down	Benzenoids	Phenanthrenes and derivatives	-	1.6355e+07	2.82142e+07	2.65989e+07	2.28648e+07	3.4895e+07	5.11228e+07	5.82032e+07	7.58675e+07
Com_2085_pos	Lysylmethionine	0.420136	-1.25107	0.00602037	1	1.80588	Down	Organic acids and derivatives	Carboxylic acids and derivatives	Amino acids, peptides, and analogues	1.26167e+07	2.14919e+07	1.29058e+07	2.1368e+07	4.80871e+07	4.78327e+07	2.57657e+07	4.10772e+07
Com_1900_pos	Lys Leu	0.413793	-1.27302	0.0430354	0.9375	1.70355	Down	Organic acids and derivatives	Carboxylic acids and derivatives	Amino acids, peptides, and analogues	2.83608e+08	5.11362e+08	4.02554e+08	5.63733e+08	7.10253e+08	1.57783e+09	1.42116e+09	5.47129e+08
Com_3144_pos	Arg Glu Met	0.413075	-1.27553	0.00119859	1	1.31565	Down	Organic acids and derivatives	Carboxylic acids and derivatives	Amino acids, peptides, and analogues	1.45408e+07	1.50143e+07	1.22694e+07	2.06199e+07	3.85265e+07	3.40446e+07	3.52518e+07	4.33466e+07
Com_3142_pos	3beta,5beta-Ketotriol	0.409796	-1.28702	0.00373107	1	2.08435	Down	Lipids and lipid-like molecules	Steroids and steroid derivatives	Cholestane steroids	1.12935e+07	1.37529e+07	1.51465e+07	1.16857e+07	3.0147e+07	3.54208e+07	3.997e+07	2.10583e+07
Com_3194_pos	N-Acetyl-leu-leu-tyr-amide	0.40951	-1.28803	0.0277469	1	1.42628	Down	Organic acids and derivatives	Carboxylic acids and derivatives	Amino acids, peptides, and analogues	1.49599e+07	8.79819e+06	1.48918e+07	2.9811e+07	4.02871e+07	4.5713e+07	4.24082e+07	3.87694e+07
Com_2356_pos	MG(0:0/i-13:0/0:0)	0.408261	-1.29244	0.000246685	1	1.56724	Down	Lipids and lipid-like molecules	Glycerolipids	Monoradylglycerols	1.04716e+08	7.74972e+07	7.81087e+07	1.03288e+08	2.09678e+08	2.08067e+08	2.60126e+08	2.12759e+08
Com_3065_pos	Glu Lys His	0.403791	-1.30832	0.00413345	1	1.23097	Down	Organic acids and derivatives	Carboxylic acids and derivatives	Amino acids, peptides, and analogues	6.95896e+07	9.44771e+07	1.25333e+08	6.19614e+07	2.40872e+08	1.95954e+08	1.70857e+08	2.62472e+08
Com_1738_pos	Ethyl N2-acetyl-L-argininate	0.395806	-1.33714	0.0111514	1	1.81364	Down	Organic acids and derivatives	Carboxylic acids and derivatives	Amino acids, peptides, and analogues	3.69275e+06	2.07975e+06	1.84049e+06	3.3992e+06	4.27206e+06	1.056e+07	6.48642e+06	6.50378e+06
Com_1296_pos	2,7-Dihydroxy-3-isopropyl-2,4,6-cycloheptatrienone	0.389267	-1.36117	0.0174818	1	1.9866	Down	Hydrocarbon derivatives	Tropones	Tropolones	2.62814e+06	828364	1.69471e+06	1.32421e+06	3.86073e+06	3.62494e+06	2.96174e+06	6.18749e+06
Com_3187_pos	Dynorphin B (10-13)	0.363392	-1.4604	0.00487051	1	1.44107	Down	Organic acids and derivatives	Carboxylic acids and derivatives	Amino acids, peptides, and analogues	1.52799e+07	9.6317e+06	9.07328e+06	1.89967e+07	3.54133e+07	3.94334e+07	2.83107e+07	4.264e+07
Com_2080_neg	Ile-Ile-Ala-Glu-Lys	0.352579	-1.50398	0.0197082	0.9375	1.59547	Down	Organic acids and derivatives	Carboxylic acids and derivatives	Amino acids, peptides, and analogues	5.00711e+06	3.20679e+06	2.2741e+06	7.16666e+06	1.43555e+07	1.11358e+07	6.40849e+06	1.81732e+07
Com_3074_pos	Arg Lys Leu	0.351331	-1.5091	0.0155444	1	1.7483	Down	Organic acids and derivatives	Carboxylic acids and derivatives	Amino acids, peptides, and analogues	1.28044e+07	6.28766e+06	1.01335e+07	2.22629e+07	3.90657e+07	3.64052e+07	2.49424e+07	4.61396e+07
Com_1428_neg	RIBULOSE 1,5-BISPHOSPHATE	0.336643	-1.57071	0.00728174	1	2.00461	Down	Organic oxygen compounds	Organooxygen compounds	Carbohydrates and carbohydrate conjugates	1.82801e+07	1.39011e+07	1.66028e+07	3.52729e+07	7.02844e+07	6.49883e+07	5.06193e+07	6.37997e+07
Com_838_pos	3beta-Hydroxy-5-cholestenoic acid	0.332263	-1.5896	0.0257812	1	1.97499	Down	Lipids and lipid-like molecules	Steroids and steroid derivatives	Bile acids, alcohols and derivatives	4.15043e+06	1.602e+07	1.43544e+07	6.0587e+06	3.36262e+07	3.34643e+07	3.66183e+07	1.84342e+07
Com_2148_neg	PIP(16:0/22:4(7Z,10Z,13Z,16Z))	0.320339	-1.64233	0.0217929	1	1.61925	Down	Lipids and lipid-like molecules	Glycerophospholipids	Glycerophosphoinositol phosphates	4.00721e+06	1.54506e+06	1.52057e+06	5.22653e+06	1.02635e+07	6.91998e+06	6.76169e+06	1.44497e+07
Com_2025_pos	Hept-5-enoylcarnitine	0.296674	-1.75305	0.010839	1	1.59562	Down	Lipids and lipid-like molecules	Fatty Acyls	Fatty acid esters	847253	494218	1.88587e+06	1.05279e+06	4.96627e+06	4.03229e+06	2.22762e+06	3.20085e+06
Com_2143_pos	Caffeine, 8-((3-methoxypropyl)amino)-	0.295053	-1.76095	0.0171712	0.9375	1.35802	Down	Organoheterocyclic compounds	Imidazopyrimidines	Purines and purine derivatives	3.9885e+06	3.1232e+06	6.99922e+06	1.10457e+07	2.71857e+07	1.8741e+07	9.59477e+06	2.97397e+07
Com_859_pos	delta-Tocotrienol	0.291773	-1.77708	0.0278441	0.9375	1.83457	Down	Lipids and lipid-like molecules	Prenol lipids	Quinone and hydroquinone lipids	2.31775e+06	1.25296e+07	6.77223e+06	3.8489e+06	1.60365e+07	2.54196e+07	3.50093e+07	1.08233e+07
Com_2819_pos	6alpha-Fluoro-11beta,17-dihydroxypregn-4-ene-3,20-dione	0.288405	-1.79383	0.0146159	1	1.64868	Down	Lipids and lipid-like molecules	Steroids and steroid derivatives	Pregnane steroids	1.09768e+06	735008	2.63876e+06	2.40686e+06	6.96447e+06	6.77174e+06	6.86601e+06	3.24728e+06
Com_1837_neg	Glutamylleucylarginine	0.285253	-1.80969	0.0387587	0.9375	1.57738	Down	Organic acids and derivatives	Carboxylic acids and derivatives	Amino acids, peptides, and analogues	5.62436e+06	8.62756e+06	1.0938e+07	2.68778e+07	6.05612e+07	4.07701e+07	1.42507e+07	6.69499e+07
Com_2097_pos	N-Benzoyl-D-arginine	0.19936	-2.32655	0.0383337	0.875	1.84825	Down	Benzenoids	Benzene and substituted derivatives	Benzoic acids and derivatives	1.21354e+07	1.54649e+06	3.48528e+06	9.5487e+06	4.6672e+07	4.28729e+07	7.58964e+06	3.68738e+07
Com_2108_neg	PS(20:4(5Z,8Z,10E,14Z)-OH(12S)/14:1(9Z))	0.0655207	-3.93191	0.0203516	0.9375	1.22643	Down	-	-	-	110984	396834	102828	129243	5.19109e+06	1.83934e+06	319658	3.94236e+06
Com_3134_pos	Homaxisterol B1	0.0352723	-4.82532	0.00186411	1	2.46996	Down	Lipids and lipid-like molecules	Steroids and steroid derivatives	-	186364	385941	947276	233247	1.21598e+07	1.40471e+07	1.2868e+07	1.06194e+07
SP, Streptococcus pneumoniae; FCP, fish collagen peptide; FC, fold-change.

## Sheet: Table SVI
Table SVI. Key genes and metabolites annotated to enriched pathways based on integrated transcriptomic and metabolomic analysis.
A, Biosynthesis of amino acids (GLU_SP vs. SP)
Classification and symbol	Title	Fold-change
Tran
ENSFCAG00000001040	PYCR3	3.767
ENSFCAG00000001422	ALDH18A1	2.617
ENSFCAG00000003976	IDH1	2.254
ENSFCAG00000001731	ENO3	1.991
ENSFCAG00000004282	ENO2	1.5
ENSFCAG00000003311	PFKL	1.458
ENSFCAG00000010097	ENO1	1.441
ENSFCAG00000018526	ACO2	1.391
ENSFCAG00000014170	ALDOA	1.314
ENSFCAG00000006874	GAPDH	1.3
Meta
Com_75_pos	L-Glutamine	5.872
Com_93_pos	L-Histidine	1.567
Com_76_pos	L-Lysine	1.451
Com_14_pos	L-Proline	1.429
Com_12_pos	L-Ornithine	1.411
Com_836_pos	S-adenosyl-L-methionine	1.365
Com_579_pos	Argininosuccinic acid	1.203
Com_156_pos	L-Arginine	1.163
Com_84_pos	L-Methionine	1.122
Com_262_pos	Citric Acid	1.115
B, Amino sugar and nucleotide sugar metabolism (FCP_SP vs. SP)
Classification and symbol	Title	Fold-change
Tran
ENSFCAG00000014124	UAP1	2.502
ENSFCAG00000010676	GMPPB	2.205
ENSFCAG00000018580	UGP2	1.885
ENSFCAG00000004474	GFPT2	1.67
ENSFCAG00000006685	PMM1	1.558
ENSFCAG00000007598	GFPT1	1.554
ENSFCAG00000012765	GNE	1.547
ENSFCAG00000004086	PMM2	1.532
ENSFCAG00000005721	PGM3	1.493
ENSFCAG00000022252	GMPPA	1.389
ENSFCAG00000004734	PGM2	1.121
Meta
Com_375_pos	Cyclic N-Acetyl-D-mannosamine	0.641
Com_228_neg	Galactose 1-phosphate	2.233
SP, Streptococcus pneumoniae; GLU, glutamine; FCP, fish collagen peptide.
